# Supplementary material for: Ensuring diagnostic testing accuracy for patient care and public health- COVID-19 testing scale-up from an EQA provider’s perspective
Source: PLOS Glob Public Health. 2023 Dec 6;3(12):e0001615. doi: 10.1371/journal.pgph.0001615 (PMC10699598; doi:10.1371/journal.pgph.0001615)
Supplement: S1 Data — (XLSX) [file pgph.0001615.s001.xlsx]

## Sheet: Results per testing site
Site #	Survey #1 - Mar 2021								Survey #2 - May 2021								Survey #3 - Jul 2021								Survey #4 - Sep 2021								Survey #5 - Nov 2021								Survey #6 - Jan 2022								Survey #7 - Mar 2022
sample	S1		S2		S3		S4 (not sent)		S1		S2		S3		S4 (not sent)		S1		S2		S3		S4		S1		S2		S3		S4		S1		S2		S3		S4		S1		S2		S3		S4		S1
method	AG	NA	AG	NA	AG	NA	AG	NA	AG	NA	AG	NA	AG	NA	AG	NA	AG	NA	AG	NA	AG	NA	AG	NA	AG	NA	AG	NA	AG	NA	AG	NA	AG	NA	AG	NA	AG	NA	AG	NA	AG	NA	AG	NA	AG	NA	AG	NA	AG
235
274
CV101a									U		A		U				A		A		A		A		A		A		A		A		A		A		A		A		A		A		A		A		A
CV101b																																		A		A		A		A		A		A		A		A
CV102a									A		A		A				A		A		A		A		A		A		A		A		A		A		A		A		A		A		A		A		A
CV102b																																		A		A		A		A		A		A		A		A
CV102c																																		A		A		A		A		A		A		A		A
CV103a									U		A		U				A		A		A		A		A		A		A		A		A		A		A		A		A		A		A		A		A
CV103b																																		A		A		A		A		A		A		A		A
CV103c																																		A		A		A		A		A		A		A		A
CV104a																	A		A		A		A		A		U		A		A		A		A		A		A		A		A		A		A		A
CV104b																																		A		A		A		A
CV105		A		A		A			A		A		A					A		A		A		A		A		A		A		A	A		A		A		A		A		A		A		A
CV105b		A		A		A				A		A		A												A		A		A		A		A		A		A		A		A		A		A		A
CV106																										A		A		A		A		A		A		A		A		A		A		A		A
CV107a		A		A		A				A		A		A				A		A		A		A		A		A		A		A		A		A		A		A		A		A		A		A
CV107b																																	A		A		A		A		A		A		A		A		A
CV108	A		U		A												A		A		A		A		A		U		A		A			U		U		U		U
CV109	A		A		A				U		A		U				A		A		A		A		A		U		A		A			U		U		U		U
CV111a									U		A		U				A		A		A		A		A		A		A		A		A		A		A		A		U		U		U		U		A
CV111b																																		A		A		A		A	A		A		A		A
CV112a	A		A		A				A		A		A				A		A		A		A		A		A		A		A		A		A		A		A		A		A		A		A		A
CV112b																	A		A		A		A		A		A		A		A		A		A		A		A		A		A		A		A
CV114									A		A		A					A		A		A		A		A		U		A		A		A		A		A		A
CV114b																	A		A		A		A			A		U		A		A		A		A		A		A	A		A		A		A		A
CV114c																										A		A		A		A		A		A		A		A									A
CV114d																										A		A		A		A
CV116a																	A		A		A		A		A		U		A		A		A		A		A		A		A		A		A		A		A
CV116b																																		A		A		A		A		A		A		A		A
CV117																		A		A		A		A		A		A		A		A		A		A		A		A		A		A		A		A
CV118																		A		A		A		A		A		A		A		A		A		A		A		A		A		A		A		A
CV119a																		A		A		A		A		A		A		A		A		A		A		A		A		A		A		A		A
CV119b
CV120																										A		A		A		A		A		A		A		A		A		A		A		A
CV121																									A		A		A		A		A		A		A		A		A		A		A		A		A
CV122																									A		A		A		A		U		U		U		A		A		A		A		A		A
CV123a																									A		U		U		U		A		A		A		A		A		A		A		A		A
CV123b																										A		A		A		A		A		A		A		A		A		A		A		A
CV123c																									A		A		A		A
CV124																										A		A		A		A		A		A		A		A		A		A		A		A
CV125
CV126																									A		U		A		A		U		U		U		A		A		A		A		A
CV127a																																										A		A		A		A
CV127b
CV127c																																																	A
CV129																									A		A		A		A		A		A		A		A		A		A		A		A		A
CV130																																									A		A		A		A		A
CV131																																																	A
CV133																																	U		U		U		U		A		A		A		A
CV134																																	A		A		A		A		A		A		A		U
CV135																																	A		A		A		A		A		A		A		A		A
CV136																																	A		A		A		A		A		A		A		A		A
CV137																																	A		A		A		A		A		A		A		A		A
CV138																																										A		A		A		A
CV139																																	A		A		A		A
CV140a																																	A		A		A		A		A		A		A		A		A
CV140b
CV141																																	A		A		A		A		A		A		A		A		A
CV142																																	U		U		U		A		A		A		A		A
CV143a																																										A		A		A		A
CV143b																																										A		A		A		A
CV143c																																																	A
CV143d
CV145a																																									A		A		A		A		A
CV145b																																									A		A		A		A
CV145c
CV146a																																									A		A		A		A		A
CV146b																																										A		A		A		A
CV147
CV148
CV149a																																									A		A		A		A		A
CV149b																																										A		A		A		A
CV150																																									A		A		A		A		A
CV151																																									A		A		A		A		A
CV152																																									A		A		A		A		A
CV153																																									A		A		A		A		A
CV154a																																									A		A		A		A		A
CV154b																																									A		A		A		A		A
CV156																																																	A
CV157																																																	A
CV158																																																	A
CV159																																																	A
CV160																																																	A
CV161a																																																	A
CV161b
CV162
CV163																																																	A
CV164
CV165																																																	A
CV166																																																	A
CV167																																																	A
CV168																																																	A
CV169a
CV169b
CV170																																																	A
CV171																																																	A
CV172																																																	A
CV173
CV174
CV175
CV176
CV177
CV178
CV179
CV180
CV181a
CV181b
CV181c
CV182
CV183
CV184
CV185
CV186
CV187
CV188
CV189a
CV189b
FHA01		A		A		A												A		A		U		A									A		A		A		A		A		U		A		A
FHA02		U		A		A												A		A		A		A									A		A		A		A		A		A		A		A
FHA03		A		A		A																											U		U		U		A		A		U		A		A
FHA04									A		A		U												A		U		A		A		A		A		A		A		A		A		A		A
FHA05									A		A		A												A		A		A		A		A		A		A		A		A		U		U		A
FHA06									A		A		A
FHA07																																	U		U		U		A		A		U		A		A
FHA08																																	U		U		U		A		A		U		A		A
FHA09																																	U		U		U		A		A		A		A		A
FHA10																																	U		U		U		A		A		A		A		A
IHA		A		A		A
IHA02	A		U		A																												U		U		U		A
IHA03		A		A		A
IHA04										A		A		A
IHA05										A		A		A
IHA06										A		U		A				A		A		A		A
IHA07										A		A		A
IHA08										A		A		A
IHA09										A		A		A
IHA10										A		A		A
IHA 11																		A		A		A		A
IHA 14																		A		A		A		A
IHA 16																		A		A		A		A
IHA 23																																										A		U		A		A
IHA 24																																										U		A		A		A
IHA 25																																										A		A		A		A
IHA 26																																										A		A		A		A
IHA 27																																										A		A		A		A
IHA 28																																										A		A		A		A
IHA 29																																										U		A		A		A
IHA 30																																										A		U		A		A
NHA01		A		A		A				A		A		A				A		A		U		A		A		A		A		A		A		A		A		A
NHA02		A		A		A				A		A		A																				A		A		A		A
NHA03									A		A		U
NHA04																										A		A		U		A
NHA05
NHA06																										U		U		A		U										A		A		A		A
NHA07																																										A		A		A		A
NHA08
NHA09
NHA10
NHA11
NHA12
NHA13
NHA14
NHA15
NHA16
PHC01	A		A		A				U		A		U
PHC02	A		U		A
PHC03	U		U		A
PHC04									U		A		U
PHC05									U		A		U
VCH01	A		U		A												A		A		A		A
VCH02	U		U		A												A		A		A		A
VCH03	A		U		A												A		A		A		A
VCH04									U		A		U
VCH05									A		A		U
VCH06									U		A		U
VCH10																									A		U		A		A
VCH11																									A		U		A		A
VCH12																									A		U		A		A
VCH13																																	A		A		A		A
VCH14																																	U		U		U		A
VCH15																																	U		U		U		A
VIHA01		A		A		A
VIHA02		A		A		A
VIHA03		A		A		A																																											U
VIHA04									U		A		U
VIHA05									A		A		A
VIHA06									U		A		U																																				A
VIHA07
VIHA08																		A		A		A		A
VIHA10																		A		A		U		U
VIHA11																		A		A		A		A
VIHA12																		A		A		A		A
VIHA13																										A		A		A		A
VIHA14																										U		A		A		A
VIHA15																										A		A		A		A
VIHA16																										U		A		A		A
VIHA17																										A		A		A		A
VIHA18																										A		A		A		A
VIHA19
VIHA20																																	U		U		U		A
VIHA21																																		U		A		A		U
VIHA22																																	U		U		U		A
VIHA23																																	A		A		U		A
VIHA24																																									A		U		A		A
VIHA25																																										U		A		A		A
VIHA26																																										A		A		A		A
VIHA27																																										A		A		A		A
VIHA28																																										A		A		A		A
VIHA30
VIHA31																																									A		U		A		A
VIHA32																																									A		U		A		A
VIHA33																																									A		U		A		A
VIHA34																																									A		U		A		A
VIHA35
VIHA36
VIHA40
[truncated: 40 more columns]

## Sheet: Results per testing site stat
Site #	Survey #	Test	Sample	Outcome
235	11	Antigen	Negative	A
235	11	Antigen	Medium positive	A
235	11	Antigen	Strong positive	A
235	11	Antigen	Negative	A
274	8	Nucleic acid	Negative	A
274	8	Nucleic acid	Strong positive	A
274	8	Nucleic acid	Negative	A
274	8	Nucleic acid	Negative	A
274	9	Nucleic acid	Strong positive	A
274	9	Nucleic acid	Negative	A
274	9	Nucleic acid	Negative	A
274	9	Nucleic acid	Medium positive	A
274	10	Nucleic acid	Negative	A
274	10	Nucleic acid	Negative	A
274	10	Nucleic acid	Medium positive	A
274	10	Nucleic acid	Strong positive	A
274	11	Nucleic acid	Negative	A
274	11	Nucleic acid	Medium positive	A
274	11	Nucleic acid	Strong positive	A
274	11	Nucleic acid	Negative	A
CV101a	2	Antigen	Medium positive	U
CV101a	2	Antigen	Negative	A
CV101a	2	Antigen	Medium positive	U
CV101a	3	Antigen	Negative	A
CV101a	3	Antigen	Strong positive	A
CV101a	3	Antigen	Negative	A
CV101a	3	Antigen	Negative	A
CV101a	4	Antigen	Negative	A
CV101a	4	Antigen	Medium positive	A
CV101a	4	Antigen	Strong positive	A
CV101a	4	Antigen	Strong positive	A
CV101a	5	Antigen	Medium positive	A
CV101a	5	Antigen	Medium positive	A
CV101a	5	Antigen	Medium positive	A
CV101a	5	Antigen	Strong positive	A
CV101a	6	Antigen	Strong positive	A
CV101a	6	Antigen	Medium positive	A
CV101a	6	Antigen	Negative	A
CV101a	6	Antigen	Negative	A
CV101a	7	Antigen	Medium positive	A
CV101a	7	Antigen	Negative	A
CV101a	7	Antigen	Medium positive	A
CV101a	7	Antigen	Strong positive	A
CV101a	8	Antigen	Negative	A
CV101a	8	Antigen	Strong positive	A
CV101a	8	Antigen	Negative	A
CV101a	8	Antigen	Negative	A
CV101a	9	Antigen	Strong positive	A
CV101a	9	Antigen	Negative	A
CV101a	9	Antigen	Negative	A
CV101a	9	Antigen	Medium positive	A
CV101a	10	Antigen	Negative	A
CV101a	10	Antigen	Negative	A
CV101a	10	Antigen	Medium positive	A
CV101a	10	Antigen	Strong positive	A
CV101a	11	Antigen	Negative	A
CV101a	11	Antigen	Medium positive	A
CV101a	11	Antigen	Strong positive	A
CV101a	11	Antigen	Negative	A
CV101b	5	Nucleic acid	Medium positive	A
CV101b	5	Nucleic acid	Medium positive	A
CV101b	5	Nucleic acid	Medium positive	A
CV101b	5	Nucleic acid	Strong positive	A
CV101b	6	Nucleic acid	Strong positive	A
CV101b	6	Nucleic acid	Medium positive	A
CV101b	6	Nucleic acid	Negative	A
CV101b	6	Nucleic acid	Negative	A
CV101b	7	Nucleic acid	Medium positive	A
CV101b	7	Nucleic acid	Negative	A
CV101b	7	Nucleic acid	Medium positive	A
CV101b	7	Nucleic acid	Strong positive	A
CV101b	8	Nucleic acid	Negative	A
CV101b	8	Nucleic acid	Strong positive	A
CV101b	8	Nucleic acid	Negative	A
CV101b	8	Nucleic acid	Negative	A
CV101b	9	Nucleic acid	Strong positive	A
CV101b	9	Nucleic acid	Negative	A
CV101b	9	Nucleic acid	Negative	A
CV101b	9	Nucleic acid	Medium positive	A
CV101b	10	Nucleic acid	Negative	A
CV101b	10	Nucleic acid	Negative	A
CV101b	10	Nucleic acid	Medium positive	A
CV101b	10	Nucleic acid	Strong positive	A
CV101b	11	Nucleic acid	Negative	A
CV101b	11	Nucleic acid	Medium positive	A
CV101b	11	Nucleic acid	Strong positive	A
CV101b	11	Nucleic acid	Negative	A
CV102a	2	Antigen	Medium positive	A
CV102a	2	Antigen	Negative	A
CV102a	2	Antigen	Medium positive	A
CV102a	3	Antigen	Negative	A
CV102a	3	Antigen	Strong positive	A
CV102a	3	Antigen	Negative	A
CV102a	3	Antigen	Negative	A
CV102a	4	Antigen	Negative	A
CV102a	4	Antigen	Medium positive	A
CV102a	4	Antigen	Strong positive	A
CV102a	4	Antigen	Strong positive	A
CV102a	5	Antigen	Medium positive	A
CV102a	5	Antigen	Medium positive	A
CV102a	5	Antigen	Medium positive	A
CV102a	5	Antigen	Strong positive	A
CV102a	6	Antigen	Strong positive	A
CV102a	6	Antigen	Medium positive	A
CV102a	6	Antigen	Negative	A
CV102a	6	Antigen	Negative	A
CV102a	7	Antigen	Medium positive	A
CV102a	7	Antigen	Negative	A
CV102a	7	Antigen	Medium positive	A
CV102a	7	Antigen	Strong positive	A
CV102b	5	Nucleic acid	Medium positive	A
CV102b	5	Nucleic acid	Medium positive	A
CV102b	5	Nucleic acid	Medium positive	A
CV102b	5	Nucleic acid	Strong positive	A
CV102b	6	Nucleic acid	Strong positive	A
CV102b	6	Nucleic acid	Medium positive	A
CV102b	6	Nucleic acid	Negative	A
CV102b	6	Nucleic acid	Negative	A
CV102b	7	Nucleic acid	Medium positive	A
CV102b	7	Nucleic acid	Negative	A
CV102b	7	Nucleic acid	Medium positive	A
CV102b	7	Nucleic acid	Strong positive	A
CV102c	5	Nucleic acid	Medium positive	A
CV102c	5	Nucleic acid	Medium positive	A
CV102c	5	Nucleic acid	Medium positive	A
CV102c	5	Nucleic acid	Strong positive	A
CV102c	6	Nucleic acid	Strong positive	A
CV102c	6	Nucleic acid	Medium positive	A
CV102c	6	Nucleic acid	Negative	A
CV102c	6	Nucleic acid	Negative	A
CV103a	2	Antigen	Medium positive	U
CV103a	2	Antigen	Negative	A
CV103a	2	Antigen	Medium positive	U
CV103a	3	Antigen	Negative	A
CV103a	3	Antigen	Strong positive	A
CV103a	3	Antigen	Negative	A
CV103a	3	Antigen	Negative	A
CV103a	4	Antigen	Negative	A
CV103a	4	Antigen	Medium positive	A
CV103a	4	Antigen	Strong positive	A
CV103a	4	Antigen	Strong positive	A
CV103a	5	Antigen	Medium positive	A
CV103a	5	Antigen	Medium positive	A
CV103a	5	Antigen	Medium positive	A
CV103a	5	Antigen	Strong positive	A
CV103a	6	Antigen	Strong positive	A
CV103a	6	Antigen	Medium positive	A
CV103a	6	Antigen	Negative	A
CV103a	6	Antigen	Negative	A
CV103a	7	Antigen	Medium positive	A
CV103a	7	Antigen	Negative	A
CV103a	7	Antigen	Medium positive	A
CV103a	7	Antigen	Strong positive	A
CV103a	8	Antigen	Negative	A
CV103a	8	Antigen	Strong positive	A
CV103a	8	Antigen	Negative	A
CV103a	8	Antigen	Negative	A
CV103a	9	Antigen	Strong positive	A
CV103a	9	Antigen	Negative	A
CV103a	9	Antigen	Negative	A
CV103a	9	Antigen	Medium positive	A
CV103a	10	Antigen	Negative	A
CV103a	10	Antigen	Negative	A
CV103a	10	Antigen	Medium positive	A
CV103a	10	Antigen	Strong positive	A
CV103a	11	Antigen	Negative	A
CV103a	11	Antigen	Medium positive	A
CV103a	11	Antigen	Strong positive	A
CV103a	11	Antigen	Negative	A
CV103b	5	Nucleic acid	Medium positive	A
CV103b	5	Nucleic acid	Medium positive	A
CV103b	5	Nucleic acid	Medium positive	A
CV103b	5	Nucleic acid	Strong positive	A
CV103b	6	Nucleic acid	Strong positive	A
CV103b	6	Nucleic acid	Medium positive	A
CV103b	6	Nucleic acid	Negative	A
CV103b	6	Nucleic acid	Negative	A
CV103b	7	Nucleic acid	Medium positive	A
CV103b	7	Nucleic acid	Negative	A
CV103b	7	Nucleic acid	Medium positive	A
CV103b	7	Nucleic acid	Strong positive	A
CV103b	8	Nucleic acid	Negative	A
CV103b	8	Nucleic acid	Strong positive	A
CV103b	8	Nucleic acid	Negative	A
CV103b	8	Nucleic acid	Negative	A
CV103b	9	Nucleic acid	Strong positive	A
CV103b	9	Nucleic acid	Negative	A
CV103b	9	Nucleic acid	Negative	A
CV103b	9	Nucleic acid	Medium positive	A
CV103b	10	Nucleic acid	Negative	A
CV103b	10	Nucleic acid	Negative	A
CV103b	10	Nucleic acid	Medium positive	A
CV103b	10	Nucleic acid	Strong positive	A
CV103b	11	Nucleic acid	Negative	A
CV103b	11	Nucleic acid	Medium positive	A
CV103b	11	Nucleic acid	Strong positive	A
CV103b	11	Nucleic acid	Negative	A
CV103c	5	Nucleic acid	Medium positive	A
CV103c	5	Nucleic acid	Medium positive	A
CV103c	5	Nucleic acid	Medium positive	A
CV103c	5	Nucleic acid	Strong positive	A
CV103c	6	Nucleic acid	Strong positive	A
CV103c	6	Nucleic acid	Medium positive	A
CV103c	6	Nucleic acid	Negative	A
CV103c	6	Nucleic acid	Negative	A
CV103c	8	Nucleic acid	Negative	A
CV103c	8	Nucleic acid	Strong positive	A
CV103c	8	Nucleic acid	Negative	A
CV103c	8	Nucleic acid	Negative	A
CV103c	9	Nucleic acid	Strong positive	A
CV103c	9	Nucleic acid	Negative	A
CV103c	9	Nucleic acid	Negative	A
CV103c	9	Nucleic acid	Medium positive	A
CV103c	10	Nucleic acid	Negative	A
CV103c	10	Nucleic acid	Negative	A
CV103c	10	Nucleic acid	Medium positive	A
CV103c	10	Nucleic acid	Strong positive	A
CV104a	3	Antigen	Negative	A
CV104a	3	Antigen	Strong positive	A
CV104a	3	Antigen	Negative	A
CV104a	3	Antigen	Negative	A
CV104a	4	Antigen	Negative	A
CV104a	4	Antigen	Medium positive	U
CV104a	4	Antigen	Strong positive	A
CV104a	4	Antigen	Strong positive	A
CV104a	5	Antigen	Medium positive	A
CV104a	5	Antigen	Medium positive	A
CV104a	5	Antigen	Medium positive	A
CV104a	5	Antigen	Strong positive	A
CV104a	6	Antigen	Strong positive	A
CV104a	6	Antigen	Medium positive	A
CV104a	6	Antigen	Negative	A
CV104a	6	Antigen	Negative	A
CV104a	7	Antigen	Medium positive	A
CV104a	7	Antigen	Negative	A
CV104a	7	Antigen	Medium positive	A
CV104a	7	Antigen	Strong positive	A
CV104a	8	Antigen	Negative	A
CV104a	8	Antigen	Strong positive	A
CV104a	8	Antigen	Negative	A
CV104a	8	Antigen	Negative	A
CV104a	9	Antigen	Strong positive	A
CV104a	9	Antigen	Negative	A
CV104a	9	Antigen	Negative	A
CV104a	9	Antigen	Medium positive	A
CV104b	5	Nucleic acid	Medium positive	A
CV104b	5	Nucleic acid	Medium positive	A
CV104b	5	Nucleic acid	Medium positive	A
CV104b	5	Nucleic acid	Strong positive	A
CV104b	7	Nucleic acid	Medium positive	A
CV104b	7	Nucleic acid	Negative	A
CV104b	7	Nucleic acid	Medium positive	A
CV104b	7	Nucleic acid	Strong positive	A
CV104b	8	Nucleic acid	Negative	A
CV104b	8	Nucleic acid	Strong positive	A
CV104b	8	Nucleic acid	Negative	A
CV104b	8	Nucleic acid	Negative	A
CV104b	9	Nucleic acid	Strong positive	A
CV104b	9	Nucleic acid	Negative	A
CV104b	9	Nucleic acid	Negative	A
CV104b	9	Nucleic acid	Medium positive	A
CV105a	1	Nucleic acid	Strong positive	A
CV105a	1	Nucleic acid	Medium positive	A
CV105a	1	Nucleic acid	Negative	A
CV105a	2	Antigen	Medium positive	A
CV105a	2	Antigen	Negative	A
CV105a	2	Antigen	Medium positive	A
CV105a	3	Nucleic acid	Negative	A
CV105a	3	Nucleic acid	Strong positive	A
CV105a	3	Nucleic acid	Negative	A
CV105a	3	Nucleic acid	Negative	A
CV105a	4	Nucleic acid	Negative	A
CV105a	4	Nucleic acid	Medium positive	A
CV105a	4	Nucleic acid	Strong positive	A
CV105a	4	Nucleic acid	Strong positive	A
CV105a	5	Antigen	Medium positive	A
CV105a	5	Antigen	Medium positive	A
CV105a	5	Antigen	Medium positive	A
CV105a	5	Antigen	Strong positive	A
CV105a	6	Antigen	Strong positive	A
CV105a	6	Antigen	Medium positive	A
CV105a	6	Antigen	Negative	A
CV105a	6	Antigen	Negative	A
CV105b	1	Nucleic acid	Strong positive	A
CV105b	1	Nucleic acid	Medium positive	A
CV105b	1	Nucleic acid	Negative	A
CV105b	2	Nucleic acid	Medium positive	A
CV105b	2	Nucleic acid	Negative	A
CV105b	2	Nucleic acid	Medium positive	A
CV105b	4	Nucleic acid	Negative	A
CV105b	4	Nucleic acid	Medium positive	A
CV105b	4	Nucleic acid	Strong positive	A
CV105b	4	Nucleic acid	Strong positive	A
CV105b	5	Nucleic acid	Medium positive	A
CV105b	5	Nucleic acid	Medium positive	A
CV105b	5	Nucleic acid	Medium positive	A
CV105b	5	Nucleic acid	Strong positive	A
CV105b	6	Nucleic acid	Strong positive	A
CV105b	6	Nucleic acid	Medium positive	A
CV105b	6	Nucleic acid	Negative	A
CV105b	6	Nucleic acid	Negative	A
CV106	4	Nucleic acid	Medium positive	A
CV106	4	Nucleic acid	Strong positive	A
CV106	4	Nucleic acid	Strong positive	A
CV106	5	Nucleic acid	Medium positive	A
CV106	5	Nucleic acid	Medium positive	A
CV106	5	Nucleic acid	Medium positive	A
CV106	5	Nucleic acid	Strong positive	A
CV106	6	Nucleic acid	Strong positive	A
CV106	6	Nucleic acid	Medium positive	A
CV106	6	Nucleic acid	Negative	A
CV106	6	Nucleic acid	Negative	A
CV106	7	Nucleic acid	Medium positive	A
CV106	7	Nucleic acid	Negative	A
CV106	7	Nucleic acid	Medium positive	A
CV106	7	Nucleic acid	Strong positive	A
CV106	8	Nucleic acid	Negative	A
CV106	8	Nucleic acid	Strong positive	A
CV106	8	Nucleic acid	Negative	A
CV106	8	Nucleic acid	Negative	A
CV106	9	Nucleic acid	Strong positive	A
CV106	9	Nucleic acid	Negative	A
CV106	9	Nucleic acid	Negative	A
CV106	9	Nucleic acid	Medium positive	A
CV106	11	Nucleic acid	Negative	A
CV106	11	Nucleic acid	Medium positive	A
CV106	11	Nucleic acid	Strong positive	A
CV106	11	Nucleic acid	Negative	A
CV107a	1	Nucleic acid	Strong positive	A
CV107a	1	Nucleic acid	Medium positive	A
CV107a	1	Nucleic acid	Negative	A
CV107a	2	Nucleic acid	Medium positive	A
CV107a	2	Nucleic acid	Negative	A
CV107a	2	Nucleic acid	Medium positive	A
CV107a	4	Nucleic acid	Negative	A
CV107a	4	Nucleic acid	Medium positive	A
CV107a	4	Nucleic acid	Strong positive	A
CV107a	4	Nucleic acid	Strong positive	A
CV107a	5	Nucleic acid	Medium positive	A
CV107a	5	Nucleic acid	Medium positive	A
CV107a	5	Nucleic acid	Medium positive	A
CV107a	5	Nucleic acid	Strong positive	A
CV107a	6	Nucleic acid	Strong positive	A
CV107a	6	Nucleic acid	Medium positive	A
CV107a	6	Nucleic acid	Negative	A
CV107a	6	Nucleic acid	Negative	A
CV107a	7	Nucleic acid	Medium positive	A
CV107a	7	Nucleic acid	Negative	A
CV107a	7	Nucleic acid	Medium positive	A
CV107a	7	Nucleic acid	Strong positive	A
CV107a	8	Nucleic acid	Negative	A
CV107a	8	Nucleic acid	Strong positive	A
CV107a	8	Nucleic acid	Negative	A
CV107a	8	Nucleic acid	Negative	A
CV107a	9	Nucleic acid	Strong positive	A
CV107a	9	Nucleic acid	Negative	A
CV107a	9	Nucleic acid	Negative	A
CV107a	9	Nucleic acid	Medium positive	A
CV107a	10	Nucleic acid	Negative	A
CV107a	10	Nucleic acid	Negative	A
CV107a	10	Nucleic acid	Medium positive	A
CV107a	10	Nucleic acid	Strong positive	A
CV107a	11	Nucleic acid	Negative	A
CV107a	11	Nucleic acid	Medium positive	A
CV107a	11	Nucleic acid	Strong positive	A
CV107a	11	Nucleic acid	Negative	A
CV107b	5	Antigen	Medium positive	A
CV107b	5	Antigen	Medium positive	A
CV107b	5	Antigen	Medium positive	A
CV107b	5	Antigen	Strong positive	A
CV107b	6	Antigen	Strong positive	A
CV107b	6	Antigen	Medium positive	A
CV107b	6	Antigen	Negative	A
CV107b	6	Antigen	Negative	A
CV107b	7	Antigen	Medium positive	A
CV107b	7	Antigen	Negative	A
CV107b	7	Antigen	Medium positive	A
CV107b	7	Antigen	Strong positive	A
CV107b	8	Antigen	Negative	A
CV107b	8	Antigen	Strong positive	A
CV107b	8	Antigen	Negative	A
CV107b	8	Antigen	Negative	A
CV107b	9	Antigen	Strong positive	A
CV107b	9	Antigen	Negative	A
CV107b	9	Antigen	Negative	A
CV107b	9	Antigen	Medium positive	A
CV107b	11	Antigen	Negative	A
CV107b	11	Antigen	Medium positive	A
CV107b	11	Antigen	Strong positive	A
CV107b	11	Antigen	Negative	A
CV108	1	Antigen	Strong positive	A
CV108	1	Antigen	Medium positive	U
CV108	1	Antigen	Negative	A
CV108	3	Antigen	Negative	A
CV108	3	Antigen	Strong positive	A
CV108	3	Antigen	Negative	A
CV108	3	Antigen	Negative	A
CV108	4	Antigen	Negative	A
CV108	4	Antigen	Medium positive	U
CV108	4	Antigen	Strong positive	A
CV108	4	Antigen	Strong positive	A
CV108	5	Antigen	Medium positive	U
CV108	5	Antigen	Medium positive	U
CV108	5	Antigen	Medium positive	U
CV108	5	Antigen	Strong positive	U
CV109	1	Antigen	Strong positive	A
CV109	1	Antigen	Medium positive	A
CV109	1	Antigen	Negative	A
CV109	2	Antigen	Medium positive	U
CV109	2	Antigen	Negative	A
CV109	2	Antigen	Medium positive	U
CV109	3	Antigen	Negative	A
CV109	3	Antigen	Strong positive	A
CV109	3	Antigen	Negative	A
CV109	3	Antigen	Negative	A
CV109	4	Antigen	Negative	A
CV109	4	Antigen	Medium positive	U
CV109	4	Antigen	Strong positive	A
CV109	4	Antigen	Strong positive	A
CV109	5	Antigen	Medium positive	U
CV109	5	Antigen	Medium positive	U
CV109	5	Antigen	Medium positive	U
CV109	5	Antigen	Strong positive	U
CV111a	2	Antigen	Medium positive	U
CV111a	2	Antigen	Negative	A
CV111a	2	Antigen	Medium positive	U
CV111a	3	Antigen	Negative	A
CV111a	3	Antigen	Strong positive	A
CV111a	3	Antigen	Negative	A
CV111a	3	Antigen	Negative	A
CV111a	4	Antigen	Negative	A
CV111a	4	Antigen	Medium positive	A
CV111a	4	Antigen	Strong positive	A
CV111a	4	Antigen	Strong positive	A
CV111a	5	Antigen	Medium positive	A
CV111a	5	Antigen	Medium positive	A
CV111a	5	Antigen	Medium positive	A
CV111a	5	Antigen	Strong positive	A
CV111a	6	Antigen	Strong positive	U
CV111a	6	Antigen	Medium positive	U
CV111a	6	Antigen	Negative	U
CV111a	6	Antigen	Negative	U
CV111a	7	Antigen	Medium positive	A
CV111a	7	Antigen	Negative	A
CV111a	7	Antigen	Medium positive	A
CV111a	7	Antigen	Strong positive	A
CV111a	8	Antigen	Negative	A
CV111a	8	Antigen	Strong positive	A
CV111a	8	Antigen	Negative	A
CV111a	8	Antigen	Negative	A
CV111a	9	Antigen	Strong positive	A
CV111a	9	Antigen	Negative	A
CV111a	9	Antigen	Negative	A
CV111a	9	Antigen	Medium positive	A
CV111b	5	Nucleic acid	Medium positive	A
CV111b	5	Nucleic acid	Medium positive	A
CV111b	5	Nucleic acid	Medium positive	A
CV111b	5	Nucleic acid	Strong positive	A
CV111b	6	Nucleic acid	Strong positive	A
CV111b	6	Nucleic acid	Medium positive	A
CV111b	6	Nucleic acid	Negative	A
CV111b	6	Nucleic acid	Negative	A
CV111b	7	Nucleic acid	Medium positive	A
CV111b	7	Nucleic acid	Negative	A
CV111b	7	Nucleic acid	Medium positive	A
CV111b	7	Nucleic acid	Strong positive	A
CV111b	8	Nucleic acid	Negative	A
CV111b	8	Nucleic acid	Strong positive	A
CV111b	8	Nucleic acid	Negative	A
CV111b	8	Nucleic acid	Negative	A
CV111b	9	Nucleic acid	Strong positive	A
CV111b	9	Nucleic acid	Negative	A
CV111b	9	Nucleic acid	Negative	A
CV111b	9	Nucleic acid	Medium positive	A
CV112a	1	Antigen	Strong positive	A
CV112a	1	Antigen	Medium positive	A
CV112a	1	Antigen	Negative	A
CV112a	2	Antigen	Medium positive	A
CV112a	2	Antigen	Negative	A
CV112a	2	Antigen	Medium positive	A
CV112a	3	Antigen	Negative	A
CV112a	3	Antigen	Strong positive	A
CV112a	3	Antigen	Negative	A
CV112a	3	Antigen	Negative	A
CV112a	4	Antigen	Negative	A
CV112a	4	Antigen	Medium positive	A
CV112a	4	Antigen	Strong positive	A
CV112a	4	Antigen	Strong positive	A
CV112a	5	Antigen	Medium positive	A
CV112a	5	Antigen	Medium positive	A
CV112a	5	Antigen	Medium positive	A
CV112a	5	Antigen	Strong positive	A
CV112a	6	Antigen	Strong positive	A
CV112a	6	Antigen	Medium positive	A
CV112a	6	Antigen	Negative	A
CV112a	6	Antigen	Negative	A
CV112a	7	Antigen	Medium positive	A
CV112a	7	Antigen	Negative	A
CV112a	7	Antigen	Medium positive	A
CV112a	7	Antigen	Strong positive	A
CV112a	8	Antigen	Negative	A
CV112a	8	Antigen	Strong positive	A
CV112a	8	Antigen	Negative	A
CV112a	8	Antigen	Negative	A
CV112a	9	Antigen	Strong positive	A
CV112a	9	Antigen	Negative	A
CV112a	9	Antigen	Negative	A
CV112a	9	Antigen	Medium positive	A
CV112a	10	Antigen	Negative	A
CV112a	10	Antigen	Negative	A
CV112a	10	Antigen	Medium positive	A
CV112a	10	Antigen	Strong positive	A
CV112b	3	Antigen	Strong positive	A
CV112b	3	Antigen	Negative	A
CV112b	3	Antigen	Negative	A
CV112b	4	Antigen	Negative	A
CV112b	4	Antigen	Medium positive	A
CV112b	4	Antigen	Strong positive	A
CV112b	4	Antigen	Strong positive	A
CV112b	5	Antigen	Medium positive	A
CV112b	5	Antigen	Medium positive	A
CV112b	5	Antigen	Medium positive	A
CV112b	5	Antigen	Strong positive	A
CV112b	6	Antigen	Strong positive	A
CV112b	6	Antigen	Medium positive	A
CV112b	6	Antigen	Negative	A
CV112b	6	Antigen	Negative	A
CV112c	10	Nucleic acid	Negative	A
CV112c	10	Nucleic acid	Negative	A
CV112c	10	Nucleic acid	Medium positive	A
CV112c	10	Nucleic acid	Strong positive	A
CV114a	2	Antigen	Medium positive	A
CV114a	2	Antigen	Negative	A
CV114a	2	Antigen	Medium positive	A
CV114a	3	Antigen	Negative	A
CV114a	3	Antigen	Strong positive	A
CV114a	3	Antigen	Negative	A
CV114a	3	Antigen	Negative	A
CV114a	4	Nucleic acid	Negative	A
CV114a	4	Nucleic acid	Medium positive	U
CV114a	4	Nucleic acid	Strong positive	A
CV114a	4	Nucleic acid	Strong positive	A
CV114a	6	Antigen	Strong positive	A
CV114a	6	Antigen	Medium positive	A
CV114a	6	Antigen	Negative	A
CV114a	6	Antigen	Negative	A
CV114a	7	Antigen	Medium positive	A
CV114a	7	Antigen	Negative	A
CV114a	7	Antigen	Medium positive	A
CV114a	7	Antigen	Strong positive	A
CV114a	8	Antigen	Negative	A
CV114a	8	Antigen	Strong positive	A
CV114a	8	Antigen	Negative	A
CV114a	8	Antigen	Negative	A
CV114a	10	Antigen	Negative	A
CV114a	10	Antigen	Negative	A
CV114a	10	Antigen	Medium positive	A
CV114a	10	Antigen	Strong positive	A
CV114b	3	Nucleic acid	Negative	A
CV114b	3	Nucleic acid	Strong positive	A
CV114b	3	Nucleic acid	Negative	A
CV114b	3	Nucleic acid	Negative	A
CV114b	4	Nucleic acid	Negative	A
CV114b	4	Nucleic acid	Medium positive	U
CV114b	4	Nucleic acid	Strong positive	A
CV114b	4	Nucleic acid	Strong positive	A
CV114b	5	Nucleic acid	Medium positive	A
CV114b	5	Nucleic acid	Medium positive	A
CV114b	5	Nucleic acid	Medium positive	A
CV114b	5	Nucleic acid	Strong positive	A
CV114b	7	Nucleic acid	Medium positive	A
CV114b	7	Nucleic acid	Negative	A
CV114b	7	Nucleic acid	Medium positive	A
CV114b	7	Nucleic acid	Strong positive	A
CV114b	8	Nucleic acid	Negative	A
CV114b	8	Nucleic acid	Strong positive	A
CV114b	8	Nucleic acid	Negative	A
CV114b	8	Nucleic acid	Negative	A
CV114b	9	Nucleic acid	Strong positive	A
CV114b	9	Nucleic acid	Negative	A
CV114b	9	Nucleic acid	Negative	A
CV114b	9	Nucleic acid	Medium positive	A
CV114b	10	Nucleic acid	Negative	A
CV114b	10	Nucleic acid	Negative	A
CV114b	10	Nucleic acid	Medium positive	A
CV114b	10	Nucleic acid	Strong positive	A
CV114c	4	Nucleic acid	Negative	A
CV114c	4	Nucleic acid	Medium positive	A
CV114c	4	Nucleic acid	Strong positive	A
CV114c	4	Nucleic acid	Strong positive	A
CV114c	5	Nucleic acid	Medium positive	A
CV114c	5	Nucleic acid	Medium positive	A
CV114c	5	Nucleic acid	Medium positive	A
CV114c	5	Nucleic acid	Strong positive	A
CV114c	7	Antigen	Medium positive	A
CV114c	7	Antigen	Negative	A
CV114c	7	Antigen	Medium positive	A
CV114c	7	Antigen	Strong positive	A
CV114c	9	Nucleic acid	Strong positive	A
CV114c	9	Nucleic acid	Negative	A
CV114c	9	Nucleic acid	Negative	A
CV114c	9	Nucleic acid	Medium positive	A
CV114d	4	Nucleic acid	Negative	A
CV114d	4	Nucleic acid	Medium positive	A
CV114d	4	Nucleic acid	Strong positive	A
CV114d	4	Nucleic acid	Strong positive	A
CV114d	5	Nucleic acid	Medium positive	A
CV114d	5	Nucleic acid	Medium positive	A
CV114d	5	Nucleic acid	Medium positive	A
CV114d	8	Nucleic acid	Negative	A
CV114d	8	Nucleic acid	Strong positive	A
CV114d	8	Nucleic acid	Negative	A
CV114d	8	Nucleic acid	Negative	A
CV114d	9	Nucleic acid	Strong positive	A
CV114d	9	Nucleic acid	Negative	A
CV114d	9	Nucleic acid	Negative	A
CV114d	9	Nucleic acid	Medium positive	A
CV114d	10	Nucleic acid	Negative	A
CV114d	10	Nucleic acid	Negative	A
CV114d	10	Nucleic acid	Medium positive	A
CV114d	10	Nucleic acid	Strong positive	A
CV116a	3	Antigen	Strong positive	A
CV116a	3	Antigen	Negative	A
CV116a	3	Antigen	Negative	A
CV116a	4	Antigen	Negative	A
CV116a	4	Antigen	Medium positive	U
CV116a	4	Antigen	Strong positive	A
CV116a	4	Antigen	Strong positive	A
CV116a	5	Antigen	Medium positive	A
CV116a	5	Antigen	Medium positive	A
CV116a	5	Antigen	Medium positive	A
CV116a	5	Antigen	Strong positive	A
CV116a	6	Antigen	Strong positive	A
CV116a	6	Antigen	Medium positive	A
CV116a	6	Antigen	Negative	A
CV116a	6	Antigen	Negative	A
CV116a	7	Antigen	Medium positive	A
CV116a	7	Antigen	Negative	A
CV116a	7	Antigen	Medium positive	A
CV116a	7	Antigen	Strong positive	A
CV116a	8	Antigen	Negative	A
CV116a	8	Antigen	Strong positive	A
CV116a	8	Antigen	Negative	A
CV116a	8	Antigen	Negative	A
CV116a	9	Antigen	Strong positive	A
CV116a	9	Antigen	Negative	A
CV116a	9	Antigen	Negative	A
CV116a	9	Antigen	Medium positive	A
CV116b	5	Nucleic acid	Medium positive	A
CV116b	5	Nucleic acid	Medium positive	A
CV116b	5	Nucleic acid	Medium positive	A
CV116b	5	Nucleic acid	Strong positive	A
CV116b	6	Nucleic acid	Strong positive	A
CV116b	6	Nucleic acid	Medium positive	A
CV116b	6	Nucleic acid	Negative	A
CV116b	6	Nucleic acid	Negative	A
CV116b	7	Nucleic acid	Medium positive	A
CV116b	7	Nucleic acid	Negative	A
CV116b	7	Nucleic acid	Medium positive	A
CV116b	7	Nucleic acid	Strong positive	A
CV116b	8	Nucleic acid	Negative	A
CV116b	8	Nucleic acid	Strong positive	A
CV116b	8	Nucleic acid	Negative	A
CV116b	8	Nucleic acid	Negative	A
CV116b	9	Nucleic acid	Strong positive	A
CV116b	9	Nucleic acid	Negative	A
CV116b	9	Nucleic acid	Negative	A
CV116b	9	Nucleic acid	Medium positive	A
CV117	3	Antigen	Strong positive	A
CV117	3	Antigen	Negative	A
CV117	3	Antigen	Negative	A
CV117	4	Antigen	Negative	A
CV117	4	Antigen	Medium positive	A
CV117	4	Antigen	Strong positive	A
CV117	4	Antigen	Strong positive	A
CV117	5	Antigen	Medium positive	A
CV117	5	Antigen	Medium positive	A
CV117	5	Antigen	Medium positive	A
CV117	5	Antigen	Strong positive	A
CV117	6	Antigen	Strong positive	A
CV117	6	Antigen	Medium positive	A
CV117	6	Antigen	Negative	A
CV117	6	Antigen	Negative	A
CV117	7	Antigen	Medium positive	A
CV117	7	Antigen	Negative	A
CV117	7	Antigen	Medium positive	A
CV117	7	Antigen	Strong positive	A
CV117	8	Antigen	Negative	A
CV117	8	Antigen	Strong positive	A
CV117	8	Antigen	Negative	A
CV117	8	Antigen	Negative	A
CV117	9	Antigen	Strong positive	A
CV117	9	Antigen	Negative	A
CV117	9	Antigen	Negative	A
CV117	9	Antigen	Medium positive	A
CV117	10	Antigen	Negative	A
CV117	10	Antigen	Negative	A
CV117	10	Antigen	Medium positive	A
CV117	10	Antigen	Strong positive	A
CV117	11	Antigen	Negative	A
CV117	11	Antigen	Medium positive	A
CV117	11	Antigen	Strong positive	A
CV117	11	Antigen	Negative	A
CV118	3	Antigen	Strong positive	A
CV118	3	Antigen	Negative	A
CV118	3	Antigen	Negative	A
CV118	4	Antigen	Negative	A
CV118	4	Antigen	Medium positive	A
CV118	4	Antigen	Strong positive	A
CV118	4	Antigen	Strong positive	A
CV118	5	Antigen	Medium positive	A
CV118	5	Antigen	Medium positive	A
CV118	5	Antigen	Medium positive	A
CV118	5	Antigen	Strong positive	A
CV118	6	Antigen	Strong positive	A
CV118	6	Antigen	Medium positive	A
CV118	6	Antigen	Negative	A
CV118	6	Antigen	Negative	A
CV118	7	Antigen	Medium positive	A
CV118	7	Antigen	Negative	A
CV118	7	Antigen	Medium positive	A
CV118	7	Antigen	Strong positive	A
CV118	8	Antigen	Negative	A
CV118	8	Antigen	Strong positive	A
CV118	8	Antigen	Negative	A
CV118	8	Antigen	Negative	A
CV118	9	Antigen	Strong positive	A
CV118	9	Antigen	Negative	A
CV118	9	Antigen	Negative	A
CV118	9	Antigen	Medium positive	A
CV118	10	Antigen	Negative	A
CV118	10	Antigen	Negative	A
CV118	10	Antigen	Medium positive	A
CV118	10	Antigen	Strong positive	A
CV118	11	Antigen	Negative	A
CV118	11	Antigen	Medium positive	A
CV118	11	Antigen	Strong positive	A
CV118	11	Antigen	Negative	A
CV119a	3	Nucleic acid	Strong positive	A
CV119a	3	Nucleic acid	Negative	A
CV119a	3	Nucleic acid	Negative	A
CV119a	4	Nucleic acid	Negative	A
CV119a	4	Nucleic acid	Medium positive	A
CV119a	4	Nucleic acid	Strong positive	A
CV119a	4	Nucleic acid	Strong positive	A
CV119a	5	Nucleic acid	Medium positive	A
CV119a	5	Nucleic acid	Medium positive	A
CV119a	5	Nucleic acid	Medium positive	A
CV119a	5	Nucleic acid	Strong positive	A
CV119a	6	Nucleic acid	Strong positive	A
CV119a	6	Nucleic acid	Medium positive	A
CV119a	6	Nucleic acid	Negative	A
CV119a	6	Nucleic acid	Negative	A
CV119a	7	Nucleic acid	Medium positive	A
CV119a	7	Nucleic acid	Negative	A
CV119a	7	Nucleic acid	Medium positive	A
CV119a	7	Nucleic acid	Strong positive	A
CV119a	8	Nucleic acid	Negative	A
CV119a	8	Nucleic acid	Strong positive	A
CV119a	8	Nucleic acid	Negative	A
CV119a	8	Nucleic acid	Negative	A
CV119a	9	Nucleic acid	Strong positive	A
CV119a	9	Nucleic acid	Negative	A
CV119a	9	Nucleic acid	Negative	A
CV119a	9	Nucleic acid	Medium positive	A
CV119a	10	Nucleic acid	Negative	A
CV119a	10	Nucleic acid	Negative	A
CV119a	10	Nucleic acid	Medium positive	A
CV119a	10	Nucleic acid	Strong positive	A
CV119a	11	Nucleic acid	Negative	A
CV119a	11	Nucleic acid	Medium positive	A
CV119a	11	Nucleic acid	Strong positive	A
CV119a	11	Nucleic acid	Negative	A
CV119b	10	Antigen	Negative	A
CV119b	10	Antigen	Negative	A
CV119b	10	Antigen	Medium positive	A
CV119b	10	Antigen	Strong positive	A
CV119b	11	Antigen	Negative	A
CV119b	11	Antigen	Medium positive	A
CV119b	11	Antigen	Strong positive	A
CV119b	11	Antigen	Negative	A
CV120	4	Nucleic acid	Negative	A
CV120	4	Nucleic acid	Medium positive	A
CV120	4	Nucleic acid	Strong positive	A
CV120	4	Nucleic acid	Strong positive	A
CV120	5	Nucleic acid	Medium positive	A
CV120	5	Nucleic acid	Medium positive	A
CV120	5	Nucleic acid	Medium positive	A
CV120	5	Nucleic acid	Strong positive	A
CV120	6	Nucleic acid	Strong positive	A
CV120	6	Nucleic acid	Medium positive	A
CV120	6	Nucleic acid	Negative	A
CV120	6	Nucleic acid	Negative	A
CV120	7	Nucleic acid	Medium positive	A
CV120	7	Nucleic acid	Negative	A
CV120	7	Nucleic acid	Medium positive	A
CV120	7	Nucleic acid	Strong positive	A
CV120	8	Nucleic acid	Negative	A
CV120	8	Nucleic acid	Strong positive	A
CV120	8	Nucleic acid	Negative	A
CV120	8	Nucleic acid	Negative	A
CV120	9	Nucleic acid	Strong positive	A
CV120	9	Nucleic acid	Negative	A
CV120	9	Nucleic acid	Negative	A
CV120	9	Nucleic acid	Medium positive	A
CV120	10	Nucleic acid	Negative	A
CV120	10	Nucleic acid	Negative	A
CV120	10	Nucleic acid	Medium positive	A
CV120	10	Nucleic acid	Strong positive	A
CV120	11	Nucleic acid	Negative	A
CV120	11	Nucleic acid	Medium positive	A
CV120	11	Nucleic acid	Strong positive	A
CV120	11	Nucleic acid	Negative	A
CV121	4	Antigen	Negative	A
CV121	4	Antigen	Medium positive	A
CV121	4	Antigen	Strong positive	A
CV121	4	Antigen	Strong positive	A
CV121	5	Antigen	Medium positive	A
CV121	5	Antigen	Medium positive	A
CV121	5	Antigen	Medium positive	A
CV121	5	Antigen	Strong positive	A
CV121	6	Antigen	Strong positive	A
CV121	6	Antigen	Medium positive	A
CV121	6	Antigen	Negative	A
CV121	6	Antigen	Negative	A
CV121	7	Antigen	Medium positive	A
CV121	7	Antigen	Negative	A
CV121	7	Antigen	Medium positive	A
CV121	7	Antigen	Strong positive	A
CV121	8	Antigen	Negative	A
CV121	8	Antigen	Strong positive	A
CV121	8	Antigen	Negative	A
CV121	8	Antigen	Negative	A
CV121	9	Antigen	Strong positive	A
CV121	9	Antigen	Negative	A
CV121	9	Antigen	Negative	A
CV121	9	Antigen	Medium positive	A
CV121	10	Antigen	Negative	A
CV121	10	Antigen	Negative	A
CV121	10	Antigen	Medium positive	A
CV121	10	Antigen	Strong positive	A
CV122	4	Antigen	Negative	A
CV122	4	Antigen	Medium positive	U
CV122	4	Antigen	Strong positive	U
CV122	4	Antigen	Strong positive	U
CV122	5	Antigen	Medium positive	U
CV122	5	Antigen	Medium positive	U
CV122	5	Antigen	Medium positive	U
CV122	5	Antigen	Strong positive	A
CV122	6	Antigen	Strong positive	A
CV122	6	Antigen	Medium positive	A
CV122	6	Antigen	Negative	A
CV122	6	Antigen	Negative	A
CV122	7	Antigen	Medium positive	A
CV122	7	Antigen	Negative	A
CV122	7	Antigen	Medium positive	A
CV122	7	Antigen	Strong positive	A
CV122	8	Antigen	Negative	A
CV122	8	Antigen	Strong positive	A
CV122	8	Antigen	Negative	A
CV122	8	Antigen	Negative	A
CV122	9	Antigen	Strong positive	A
CV122	9	Antigen	Negative	A
CV122	9	Antigen	Negative	A
CV122	9	Antigen	Medium positive	A
CV122	10	Antigen	Negative	A
CV122	10	Antigen	Negative	A
CV122	10	Antigen	Medium positive	A
CV122	10	Antigen	Strong positive	A
CV123a	4	Antigen	Negative	A
CV123a	4	Antigen	Medium positive	A
CV123a	4	Antigen	Strong positive	A
CV123a	4	Antigen	Strong positive	A
CV123a	5	Antigen	Medium positive	U
CV123a	5	Antigen	Medium positive	U
CV123a	5	Antigen	Medium positive	U
CV123a	5	Antigen	Strong positive	A
CV123a	6	Antigen	Strong positive	A
CV123a	6	Antigen	Medium positive	A
CV123a	6	Antigen	Negative	A
CV123a	6	Antigen	Negative	A
CV123a	7	Antigen	Medium positive	A
CV123a	7	Antigen	Negative	A
CV123a	7	Antigen	Medium positive	A
CV123a	7	Antigen	Strong positive	A
CV123a	8	Antigen	Negative	A
CV123a	8	Antigen	Strong positive	A
CV123a	8	Antigen	Negative	A
CV123a	8	Antigen	Negative	A
CV123a	9	Antigen	Strong positive	A
CV123a	9	Antigen	Negative	A
CV123a	9	Antigen	Negative	A
CV123a	9	Antigen	Medium positive	A
CV123a	10	Antigen	Negative	A
CV123a	10	Antigen	Negative	A
CV123a	10	Antigen	Medium positive	A
CV123a	10	Antigen	Strong positive	A
CV123b	4	Nucleic acid	Negative	A
CV123b	4	Nucleic acid	Medium positive	A
CV123b	4	Nucleic acid	Strong positive	A
CV123b	4	Nucleic acid	Strong positive	A
CV123b	5	Nucleic acid	Medium positive	A
CV123b	5	Nucleic acid	Medium positive	A
CV123b	5	Nucleic acid	Medium positive	A
CV123b	5	Nucleic acid	Strong positive	A
CV123b	6	Nucleic acid	Strong positive	A
CV123b	6	Nucleic acid	Medium positive	A
CV123b	6	Nucleic acid	Negative	A
CV123b	6	Nucleic acid	Negative	A
CV123b	7	Nucleic acid	Medium positive	A
CV123b	7	Nucleic acid	Negative	A
CV123b	7	Nucleic acid	Medium positive	A
CV123b	7	Nucleic acid	Strong positive	A
CV123b	8	Nucleic acid	Negative	A
CV123b	8	Nucleic acid	Strong positive	A
CV123b	8	Nucleic acid	Negative	A
CV123b	8	Nucleic acid	Negative	A
CV123b	10	Nucleic acid	Negative	A
CV123b	10	Nucleic acid	Negative	A
CV123b	10	Nucleic acid	Medium positive	A
CV123b	10	Nucleic acid	Strong positive	A
CV123c	4	Antigen	Negative	A
CV123c	4	Antigen	Medium positive	A
CV123c	4	Antigen	Strong positive	A
CV123c	4	Antigen	Strong positive	A
CV124	4	Nucleic acid	Negative	A
CV124	4	Nucleic acid	Medium positive	A
CV124	4	Nucleic acid	Strong positive	A
CV124	4	Nucleic acid	Strong positive	A
CV124	5	Nucleic acid	Medium positive	A
CV124	5	Nucleic acid	Medium positive	A
CV124	5	Nucleic acid	Medium positive	A
CV124	5	Nucleic acid	Strong positive	A
CV124	6	Nucleic acid	Strong positive	A
CV124	6	Nucleic acid	Medium positive	A
CV124	6	Nucleic acid	Negative	A
CV124	6	Nucleic acid	Negative	A
CV124	9	Nucleic acid	Strong positive	A
CV124	9	Nucleic acid	Negative	A
CV124	9	Nucleic acid	Negative	A
CV124	9	Nucleic acid	Medium positive	A
CV124	10	Nucleic acid	Negative	A
CV124	10	Nucleic acid	Negative	A
CV124	10	Nucleic acid	Medium positive	A
CV124	10	Nucleic acid	Strong positive	A
CV125	8	Nucleic acid	Negative	A
CV125	8	Nucleic acid	Strong positive	A
CV125	8	Nucleic acid	Negative	A
CV125	8	Nucleic acid	Negative	A
CV125	9	Nucleic acid	Strong positive	A
CV125	9	Nucleic acid	Negative	A
CV125	9	Nucleic acid	Negative	A
CV125	9	Nucleic acid	Medium positive	A
CV125	10	Nucleic acid	Negative	A
CV125	10	Nucleic acid	Negative	A
CV125	10	Nucleic acid	Medium positive	A
CV125	10	Nucleic acid	Strong positive	A
CV125	11	Nucleic acid	Negative	A
CV125	11	Nucleic acid	Medium positive	A
CV125	11	Nucleic acid	Strong positive	A
CV125	11	Nucleic acid	Negative	A
CV126	4	Antigen	Negative	A
CV126	4	Antigen	Medium positive	U
CV126	4	Antigen	Strong positive	A
CV126	4	Antigen	Strong positive	A
CV126	5	Antigen	Medium positive	U
CV126	5	Antigen	Medium positive	U
CV126	5	Antigen	Medium positive	U
CV126	5	Antigen	Strong positive	A
CV126	6	Antigen	Strong positive	A
CV126	6	Antigen	Medium positive	A
CV126	6	Antigen	Negative	A
CV126	6	Antigen	Negative	A
CV127a	6	Nucleic acid	Strong positive	A
CV127a	6	Nucleic acid	Medium positive	A
CV127a	6	Nucleic acid	Negative	A
CV127a	6	Nucleic acid	Negative	A
CV127a	7	Nucleic acid	Medium positive	A
CV127a	7	Nucleic acid	Negative	A
CV127a	7	Nucleic acid	Medium positive	A
CV127a	7	Nucleic acid	Strong positive	A
CV127a	8	Nucleic acid	Negative	A
CV127a	8	Nucleic acid	Strong positive	A
CV127a	8	Nucleic acid	Negative	A
CV127a	8	Nucleic acid	Negative	A
CV127a	9	Nucleic acid	Strong positive	A
CV127a	9	Nucleic acid	Negative	A
CV127a	9	Nucleic acid	Negative	A
CV127a	9	Nucleic acid	Medium positive	A
CV127b	7	Nucleic acid	Medium positive	A
CV127b	7	Nucleic acid	Negative	A
CV127b	7	Nucleic acid	Medium positive	A
CV127b	7	Nucleic acid	Strong positive	A
CV127b	9	Nucleic acid	Strong positive	A
CV127b	9	Nucleic acid	Negative	A
CV127b	9	Nucleic acid	Negative	A
CV127b	9	Nucleic acid	Medium positive	A
CV127c	7	Antigen	Medium positive	A
CV127c	7	Antigen	Negative	A
CV127c	7	Antigen	Medium positive	A
CV127c	7	Antigen	Strong positive	A
CV127c	8	Antigen	Negative	A
CV127c	8	Antigen	Strong positive	A
CV127c	8	Antigen	Negative	A
CV127c	8	Antigen	Negative	A
CV127c	9	Antigen	Strong positive	A
CV127c	9	Antigen	Negative	A
CV127c	9	Antigen	Negative	A
CV127c	9	Antigen	Medium positive	A
CV129	4	Antigen	Negative	A
CV129	4	Antigen	Medium positive	A
CV129	4	Antigen	Strong positive	A
CV129	4	Antigen	Strong positive	A
CV129	5	Antigen	Medium positive	A
CV129	5	Antigen	Medium positive	A
CV129	5	Antigen	Medium positive	A
CV129	5	Antigen	Strong positive	A
CV129	6	Antigen	Strong positive	A
CV129	6	Antigen	Medium positive	A
CV129	6	Antigen	Negative	A
CV129	6	Antigen	Negative	A
CV129	7	Antigen	Medium positive	A
CV129	7	Antigen	Negative	A
CV129	7	Antigen	Medium positive	A
CV129	7	Antigen	Strong positive	A
CV129	8	Antigen	Negative	A
CV129	8	Antigen	Strong positive	A
CV129	8	Antigen	Negative	A
CV129	8	Antigen	Negative	A
CV129	9	Antigen	Strong positive	A
CV129	9	Antigen	Negative	A
CV129	9	Antigen	Negative	A
CV129	9	Antigen	Medium positive	A
CV129	10	Antigen	Negative	A
CV129	10	Antigen	Negative	A
CV129	10	Antigen	Medium positive	A
CV129	10	Antigen	Strong positive	A
CV129	11	Antigen	Negative	A
CV129	11	Antigen	Medium positive	U
CV129	11	Antigen	Strong positive	A
CV129	11	Antigen	Negative	A
CV130	6	Antigen	Strong positive	A
CV130	6	Antigen	Medium positive	A
CV130	6	Antigen	Negative	A
CV130	6	Antigen	Negative	A
CV130	7	Antigen	Medium positive	A
CV130	7	Antigen	Negative	A
CV130	7	Antigen	Medium positive	A
CV130	7	Antigen	Strong positive	A
CV131	7	Antigen	Medium positive	A
CV131	7	Antigen	Negative	A
CV131	7	Antigen	Medium positive	A
CV131	7	Antigen	Strong positive	A
CV133	5	Antigen	Medium positive	U
CV133	5	Antigen	Medium positive	U
CV133	5	Antigen	Medium positive	U
CV133	5	Antigen	Strong positive	U
CV133	6	Antigen	Strong positive	A
CV133	6	Antigen	Medium positive	A
CV133	6	Antigen	Negative	A
CV133	6	Antigen	Negative	A
CV134	5	Antigen	Medium positive	A
CV134	5	Antigen	Medium positive	A
CV134	5	Antigen	Medium positive	A
CV134	5	Antigen	Strong positive	A
CV134	6	Antigen	Strong positive	A
CV134	6	Antigen	Medium positive	A
CV134	6	Antigen	Negative	U
CV134	6	Antigen	Negative	A
CV134	8	Antigen	Negative	A
CV134	8	Antigen	Strong positive	A
CV134	8	Antigen	Negative	A
CV134	8	Antigen	Negative	A
CV134	9	Antigen	Strong positive	A
CV134	9	Antigen	Negative	A
CV134	9	Antigen	Negative	A
CV134	9	Antigen	Medium positive	A
CV134	10	Antigen	Negative	A
CV134	10	Antigen	Negative	A
CV134	10	Antigen	Medium positive	A
CV134	10	Antigen	Strong positive	A
CV134	11	Antigen	Negative	A
CV134	11	Antigen	Medium positive	A
CV134	11	Antigen	Strong positive	A
CV134	11	Antigen	Negative	A
CV135	5	Antigen	Medium positive	A
CV135	5	Antigen	Medium positive	A
CV135	5	Antigen	Medium positive	A
CV135	5	Antigen	Strong positive	A
CV135	6	Antigen	Strong positive	A
CV135	6	Antigen	Medium positive	A
CV135	6	Antigen	Negative	A
CV135	6	Antigen	Negative	A
CV135	8	Antigen	Negative	A
CV135	8	Antigen	Strong positive	A
CV135	8	Antigen	Negative	A
CV135	8	Antigen	Negative	A
CV135	10	Antigen	Negative	A
CV135	10	Antigen	Negative	A
CV135	10	Antigen	Medium positive	A
CV135	10	Antigen	Strong positive	A
CV135	11	Antigen	Negative	A
CV135	11	Antigen	Medium positive	A
CV135	11	Antigen	Strong positive	A
CV135	11	Antigen	Negative	A
CV137	5	Antigen	Medium positive	A
CV137	5	Antigen	Medium positive	A
CV137	5	Antigen	Medium positive	A
CV137	5	Antigen	Strong positive	A
CV137	6	Antigen	Strong positive	A
CV137	6	Antigen	Medium positive	A
CV137	6	Antigen	Negative	A
CV137	6	Antigen	Negative	A
CV137	8	Antigen	Negative	A
CV137	8	Antigen	Strong positive	A
CV137	8	Antigen	Negative	A
CV137	8	Antigen	Negative	A
CV137	11	Antigen	Negative	A
CV137	11	Antigen	Medium positive	A
CV137	11	Antigen	Strong positive	A
CV137	11	Antigen	Negative	A
CV138	6	Nucleic acid	Strong positive	A
CV138	6	Nucleic acid	Medium positive	A
CV138	6	Nucleic acid	Negative	A
CV138	6	Nucleic acid	Negative	A
CV139	5	Antigen	Medium positive	A
CV139	5	Antigen	Medium positive	A
CV139	5	Antigen	Medium positive	A
CV139	5	Antigen	Strong positive	A
CV140a	5	Antigen	Medium positive	A
CV140a	5	Antigen	Medium positive	A
CV140a	5	Antigen	Medium positive	A
CV140a	5	Antigen	Strong positive	A
CV140a	6	Antigen	Strong positive	A
CV140a	6	Antigen	Medium positive	A
CV140a	6	Antigen	Negative	A
CV140a	6	Antigen	Negative	A
CV140a	8	Antigen	Negative	A
CV140a	8	Antigen	Strong positive	A
CV140a	8	Antigen	Negative	A
CV140a	8	Antigen	Negative	A
CV140a	9	Antigen	Strong positive	A
CV140a	9	Antigen	Negative	A
CV140a	9	Antigen	Negative	A
CV140a	9	Antigen	Medium positive	A
CV140b	7	Nucleic acid	Medium positive	A
CV140b	7	Nucleic acid	Negative	A
CV140b	7	Nucleic acid	Medium positive	A
CV140b	7	Nucleic acid	Strong positive	A
CV140b	9	Nucleic acid	Strong positive	A
CV140b	9	Nucleic acid	Negative	A
CV140b	9	Nucleic acid	Negative	A
CV140b	9	Nucleic acid	Medium positive	A
CV141	5	Antigen	Medium positive	A
CV141	5	Antigen	Medium positive	A
CV141	5	Antigen	Medium positive	A
CV141	5	Antigen	Strong positive	A
CV141	6	Antigen	Strong positive	A
CV141	6	Antigen	Medium positive	A
CV141	6	Antigen	Negative	A
CV141	6	Antigen	Negative	A
CV141	8	Antigen	Negative	A
CV141	8	Antigen	Strong positive	A
CV141	8	Antigen	Negative	A
CV141	8	Antigen	Negative	A
CV141	9	Antigen	Strong positive	A
CV141	9	Antigen	Negative	A
CV141	9	Antigen	Negative	A
CV141	9	Antigen	Medium positive	A
CV141	10	Antigen	Negative	A
CV141	10	Antigen	Negative	A
CV141	10	Antigen	Medium positive	A
CV141	10	Antigen	Strong positive	A
CV141	11	Antigen	Negative	A
CV141	11	Antigen	Medium positive	A
CV141	11	Antigen	Strong positive	A
CV141	11	Antigen	Negative	A
CV142	5	Antigen	Medium positive	U
CV142	5	Antigen	Medium positive	U
CV142	5	Antigen	Medium positive	U
CV142	5	Antigen	Strong positive	A
CV142	6	Antigen	Strong positive	A
CV142	6	Antigen	Medium positive	A
CV142	6	Antigen	Negative	A
CV142	6	Antigen	Negative	A
CV143a	6	Nucleic acid	Strong positive	A
CV143a	6	Nucleic acid	Medium positive	A
CV143a	6	Nucleic acid	Negative	A
CV143a	6	Nucleic acid	Negative	A
CV143a	7	Nucleic acid	Medium positive	A
CV143a	7	Nucleic acid	Negative	A
CV143a	7	Nucleic acid	Medium positive	A
CV143a	7	Nucleic acid	Strong positive	A
CV143a	8	Nucleic acid	Negative	A
CV143a	8	Nucleic acid	Strong positive	A
CV143a	8	Nucleic acid	Negative	A
CV143a	8	Nucleic acid	Negative	A
CV143a	9	Nucleic acid	Strong positive	A
CV143a	9	Nucleic acid	Negative	A
CV143a	9	Nucleic acid	Negative	A
CV143a	9	Nucleic acid	Medium positive	A
CV143a	10	Nucleic acid	Negative	A
CV143a	10	Nucleic acid	Negative	A
CV143a	10	Nucleic acid	Medium positive	A
CV143a	10	Nucleic acid	Strong positive	A
CV143a	11	Nucleic acid	Negative	A
CV143a	11	Nucleic acid	Medium positive	A
CV143a	11	Nucleic acid	Strong positive	A
CV143a	11	Nucleic acid	Negative	A
CV143b	6	Nucleic acid	Strong positive	A
CV143b	6	Nucleic acid	Medium positive	A
CV143b	6	Nucleic acid	Negative	A
CV143b	6	Nucleic acid	Negative	A
CV143b	7	Nucleic acid	Medium positive	A
CV143b	7	Nucleic acid	Negative	A
CV143b	7	Nucleic acid	Medium positive	A
CV143b	7	Nucleic acid	Strong positive	A
CV143b	8	Nucleic acid	Negative	A
CV143b	8	Nucleic acid	Strong positive	A
CV143b	8	Nucleic acid	Negative	A
CV143b	8	Nucleic acid	Negative	A
CV143b	9	Nucleic acid	Strong positive	A
CV143b	9	Nucleic acid	Negative	A
CV143b	9	Nucleic acid	Negative	A
CV143b	9	Nucleic acid	Medium positive	A
CV143b	11	Nucleic acid	Negative	A
CV143b	11	Nucleic acid	Medium positive	A
CV143b	11	Nucleic acid	Strong positive	A
CV143b	11	Nucleic acid	Negative	A
CV143c	7	Antigen	Medium positive	A
CV143c	7	Antigen	Negative	A
CV143c	7	Antigen	Medium positive	A
CV143c	7	Antigen	Strong positive	A
CV143c	8	Antigen	Negative	A
CV143c	8	Antigen	Strong positive	A
CV143c	8	Antigen	Negative	A
CV143c	8	Antigen	Negative	A
CV143c	11	Antigen	Negative	A
CV143c	11	Antigen	Medium positive	A
CV143c	11	Antigen	Strong positive	A
CV143c	11	Antigen	Negative	A
CV143d	11	Antigen	Negative	A
CV143d	11	Antigen	Medium positive	A
CV143d	11	Antigen	Strong positive	A
CV143d	11	Antigen	Negative	A
CV145a	6	Antigen	Strong positive	A
CV145a	6	Antigen	Medium positive	A
CV145a	6	Antigen	Negative	A
CV145a	6	Antigen	Negative	A
CV145a	7	Antigen	Medium positive	A
CV145a	7	Antigen	Negative	A
CV145a	7	Antigen	Medium positive	A
CV145a	7	Antigen	Strong positive	A
CV145a	8	Antigen	Negative	A
CV145a	8	Antigen	Strong positive	A
CV145a	8	Antigen	Negative	A
CV145a	8	Antigen	Negative	A
CV145a	9	Antigen	Strong positive	A
CV145a	9	Antigen	Negative	A
CV145a	9	Antigen	Negative	A
CV145a	9	Antigen	Medium positive	A
CV145b	6	Nucleic acid	Strong positive	A
CV145b	6	Nucleic acid	Medium positive	A
CV145b	6	Nucleic acid	Negative	A
CV145b	6	Nucleic acid	Negative	A
CV145b	7	Nucleic acid	Medium positive	A
CV145b	7	Nucleic acid	Negative	A
CV145b	7	Nucleic acid	Medium positive	A
CV145b	7	Nucleic acid	Strong positive	A
CV145b	8	Nucleic acid	Negative	A
CV145b	8	Nucleic acid	Strong positive	A
CV145b	8	Nucleic acid	Negative	A
CV145b	8	Nucleic acid	Negative	A
CV145b	9	Nucleic acid	Strong positive	A
CV145b	9	Nucleic acid	Negative	A
CV145b	9	Nucleic acid	Negative	A
CV145b	9	Nucleic acid	Medium positive	A
CV145c	7	Nucleic acid	Medium positive	A
CV145c	7	Nucleic acid	Negative	A
CV145c	7	Nucleic acid	Medium positive	A
CV145c	7	Nucleic acid	Strong positive	A
CV146a	6	Antigen	Strong positive	A
CV146a	6	Antigen	Medium positive	A
CV146a	6	Antigen	Negative	A
CV146a	6	Antigen	Negative	A
CV146a	7	Antigen	Medium positive	A
CV146a	7	Antigen	Negative	A
CV146a	7	Antigen	Medium positive	A
CV146a	7	Antigen	Strong positive	A
CV146b	6	Nucleic acid	Strong positive	A
CV146b	6	Nucleic acid	Medium positive	A
CV146b	6	Nucleic acid	Negative	A
CV146b	6	Nucleic acid	Negative	A
CV146b	7	Nucleic acid	Medium positive	A
CV146b	7	Nucleic acid	Negative	A
CV146b	7	Nucleic acid	Medium positive	A
CV146b	7	Nucleic acid	Strong positive	A
CV147	8	Antigen	Negative	A
CV147	8	Antigen	Strong positive	A
CV147	8	Antigen	Negative	A
CV147	8	Antigen	Negative	A
CV147	9	Antigen	Strong positive	A
CV147	9	Antigen	Negative	A
CV147	9	Antigen	Negative	A
CV147	9	Antigen	Medium positive	A
CV147	10	Antigen	Negative	A
CV147	10	Antigen	Negative	A
CV147	10	Antigen	Medium positive	A
CV147	10	Antigen	Strong positive	A
CV147	11	Antigen	Negative	A
CV147	11	Antigen	Medium positive	U
CV147	11	Antigen	Strong positive	A
CV147	11	Antigen	Negative	A
CV148	8	Antigen	Negative	A
CV148	8	Antigen	Strong positive	A
CV148	8	Antigen	Negative	A
CV148	8	Antigen	Negative	A
CV148	9	Antigen	Strong positive	A
CV148	9	Antigen	Negative	A
CV148	9	Antigen	Negative	A
CV148	9	Antigen	Medium positive	A
CV148	10	Antigen	Negative	A
CV148	10	Antigen	Negative	A
CV148	10	Antigen	Medium positive	A
CV148	10	Antigen	Strong positive	A
CV148	11	Antigen	Negative	A
CV148	11	Antigen	Medium positive	U
CV148	11	Antigen	Strong positive	A
CV148	11	Antigen	Negative	A
CV149a	6	Antigen	Strong positive	A
CV149a	6	Antigen	Medium positive	A
CV149a	6	Antigen	Negative	A
CV149a	6	Antigen	Negative	A
CV149a	7	Antigen	Medium positive	A
CV149a	7	Antigen	Negative	A
CV149a	7	Antigen	Medium positive	A
CV149a	7	Antigen	Strong positive	A
CV149a	8	Antigen	Negative	A
CV149a	8	Antigen	Strong positive	A
CV149a	8	Antigen	Negative	A
CV149a	8	Antigen	Negative	A
CV149a	9	Antigen	Strong positive	A
CV149a	9	Antigen	Negative	A
CV149a	9	Antigen	Negative	A
CV149a	9	Antigen	Medium positive	A
CV149a	10	Antigen	Negative	A
CV149a	10	Antigen	Negative	A
CV149a	10	Antigen	Medium positive	A
CV149a	10	Antigen	Strong positive	A
CV149b	6	Nucleic acid	Strong positive	A
CV149b	6	Nucleic acid	Medium positive	A
CV149b	6	Nucleic acid	Negative	A
CV149b	6	Nucleic acid	Negative	A
CV149b	7	Nucleic acid	Medium positive	A
CV149b	7	Nucleic acid	Negative	A
CV149b	7	Nucleic acid	Medium positive	A
CV149b	7	Nucleic acid	Strong positive	A
CV149b	8	Nucleic acid	Negative	A
CV149b	8	Nucleic acid	Strong positive	A
CV149b	8	Nucleic acid	Negative	A
CV149b	8	Nucleic acid	Negative	A
CV149b	10	Nucleic acid	Negative	A
CV149b	10	Nucleic acid	Negative	A
CV149b	10	Nucleic acid	Medium positive	A
CV149b	10	Nucleic acid	Strong positive	A
CV150	6	Antigen	Strong positive	A
CV150	6	Antigen	Medium positive	A
CV150	6	Antigen	Negative	A
CV150	6	Antigen	Negative	A
CV150	7	Antigen	Medium positive	A
CV150	7	Antigen	Negative	A
CV150	7	Antigen	Medium positive	A
CV150	7	Antigen	Strong positive	A
CV150	8	Antigen	Negative	A
CV150	8	Antigen	Strong positive	A
CV150	8	Antigen	Negative	A
CV150	8	Antigen	Negative	A
CV150	10	Antigen	Negative	A
CV150	10	Antigen	Negative	A
CV150	10	Antigen	Medium positive	A
CV150	10	Antigen	Strong positive	A
CV151	6	Antigen	Strong positive	A
CV151	6	Antigen	Medium positive	A
CV151	6	Antigen	Negative	A
CV151	6	Antigen	Negative	A
CV151	7	Antigen	Medium positive	A
CV151	7	Antigen	Negative	A
CV151	7	Antigen	Medium positive	A
CV151	7	Antigen	Strong positive	A
CV151	8	Antigen	Negative	A
CV151	8	Antigen	Strong positive	A
CV151	8	Antigen	Negative	A
CV151	8	Antigen	Negative	A
CV151	10	Antigen	Negative	A
CV151	10	Antigen	Negative	A
CV151	10	Antigen	Medium positive	A
CV151	10	Antigen	Strong positive	A
CV152	6	Antigen	Strong positive	A
CV152	6	Antigen	Medium positive	A
CV152	6	Antigen	Negative	A
CV152	6	Antigen	Negative	A
CV152	7	Antigen	Medium positive	A
CV152	7	Antigen	Negative	A
CV152	7	Antigen	Medium positive	A
CV152	7	Antigen	Strong positive	A
CV152	8	Antigen	Negative	A
CV152	8	Antigen	Strong positive	A
CV152	8	Antigen	Negative	A
CV152	8	Antigen	Negative	A
CV152	10	Antigen	Negative	A
CV152	10	Antigen	Negative	A
CV152	10	Antigen	Medium positive	A
CV152	10	Antigen	Strong positive	A
CV152	11	Antigen	Negative	A
CV152	11	Antigen	Medium positive	A
CV152	11	Antigen	Strong positive	A
CV152	11	Antigen	Negative	A
CV153	6	Antigen	Strong positive	A
CV153	6	Antigen	Medium positive	A
CV153	6	Antigen	Negative	A
CV153	6	Antigen	Negative	A
CV153	7	Antigen	Medium positive	A
CV153	7	Antigen	Negative	A
CV153	7	Antigen	Medium positive	A
CV153	7	Antigen	Strong positive	A
CV153	8	Antigen	Negative	A
CV153	8	Antigen	Strong positive	A
CV153	8	Antigen	Negative	A
CV153	8	Antigen	Negative	A
CV153	10	Antigen	Negative	A
CV153	10	Antigen	Negative	A
CV153	10	Antigen	Medium positive	A
CV153	10	Antigen	Strong positive	A
CV154a	6	Antigen	Strong positive	A
CV154a	6	Antigen	Medium positive	A
CV154a	6	Antigen	Negative	A
CV154a	6	Antigen	Negative	A
CV154a	7	Antigen	Medium positive	A
CV154a	7	Antigen	Negative	A
CV154a	7	Antigen	Medium positive	A
CV154a	7	Antigen	Strong positive	A
CV154a	8	Antigen	Negative	A
CV154a	8	Antigen	Strong positive	A
CV154a	8	Antigen	Negative	A
CV154a	8	Antigen	Negative	A
CV154a	9	Antigen	Strong positive	A
CV154a	9	Antigen	Negative	A
CV154a	9	Antigen	Negative	A
CV154a	9	Antigen	Medium positive	A
CV154a	10	Antigen	Negative	A
CV154a	10	Antigen	Negative	A
CV154a	10	Antigen	Medium positive	A
CV154a	10	Antigen	Strong positive	A
CV154a	11	Antigen	Negative	A
CV154a	11	Antigen	Medium positive	A
CV154a	11	Antigen	Strong positive	A
CV154a	11	Antigen	Negative	A
CV154b	6	Antigen	Strong positive	A
CV154b	6	Antigen	Medium positive	A
CV154b	6	Antigen	Negative	A
CV154b	6	Antigen	Negative	A
CV154b	7	Antigen	Medium positive	A
CV154b	7	Antigen	Negative	A
CV154b	7	Antigen	Medium positive	A
CV154b	7	Antigen	Strong positive	A
CV154b	8	Antigen	Negative	A
CV154b	8	Antigen	Strong positive	A
CV154b	8	Antigen	Negative	A
CV154b	8	Antigen	Negative	A
CV154b	9	Antigen	Strong positive	A
CV154b	9	Antigen	Negative	A
CV154b	9	Antigen	Negative	A
CV154b	9	Antigen	Medium positive	A
CV154b	10	Antigen	Negative	A
CV154b	10	Antigen	Negative	A
CV154b	10	Antigen	Medium positive	A
CV154b	10	Antigen	Strong positive	A
CV156	7	Antigen	Medium positive	A
CV156	7	Antigen	Negative	A
CV156	7	Antigen	Medium positive	A
CV156	7	Antigen	Strong positive	A
CV156	8	Antigen	Negative	A
CV156	8	Antigen	Strong positive	A
CV156	8	Antigen	Negative	A
CV156	8	Antigen	Negative	A
CV156	9	Antigen	Strong positive	A
CV156	9	Antigen	Negative	A
CV156	9	Antigen	Negative	A
CV156	9	Antigen	Medium positive	A
CV156	10	Antigen	Negative	A
CV156	10	Antigen	Negative	A
CV156	10	Antigen	Medium positive	U
CV156	10	Antigen	Strong positive	A
CV156	11	Antigen	Negative	A
CV156	11	Antigen	Medium positive	U
CV156	11	Antigen	Strong positive	A
CV156	11	Antigen	Negative	A
CV157	7	Antigen	Medium positive	A
CV157	7	Antigen	Negative	A
CV157	7	Antigen	Medium positive	A
CV157	7	Antigen	Strong positive	A
CV157	8	Antigen	Negative	A
CV157	8	Antigen	Strong positive	A
CV157	8	Antigen	Negative	A
CV157	8	Antigen	Negative	A
CV157	10	Antigen	Negative	A
CV157	10	Antigen	Negative	A
CV157	10	Antigen	Medium positive	A
CV157	10	Antigen	Strong positive	A
CV158	7	Antigen	Medium positive	A
CV158	7	Antigen	Negative	A
CV158	7	Antigen	Medium positive	A
CV158	7	Antigen	Strong positive	A
CV158	8	Antigen	Negative	A
CV158	8	Antigen	Strong positive	A
CV158	8	Antigen	Negative	A
CV158	8	Antigen	Negative	A
CV158	10	Antigen	Negative	A
CV158	10	Antigen	Negative	A
CV158	10	Antigen	Medium positive	A
CV158	10	Antigen	Strong positive	A
CV158	11	Antigen	Negative	A
CV158	11	Antigen	Medium positive	A
CV158	11	Antigen	Strong positive	A
CV158	11	Antigen	Negative	A
CV159	7	Antigen	Medium positive	A
CV159	7	Antigen	Negative	A
CV159	7	Antigen	Medium positive	A
CV159	7	Antigen	Strong positive	A
CV159	8	Antigen	Negative	A
CV159	8	Antigen	Strong positive	A
CV159	8	Antigen	Negative	A
CV159	8	Antigen	Negative	A
CV159	10	Antigen	Negative	A
CV159	10	Antigen	Negative	A
CV159	10	Antigen	Medium positive	A
CV159	10	Antigen	Strong positive	A
CV160	7	Antigen	Medium positive	A
CV160	7	Antigen	Negative	A
CV160	7	Antigen	Medium positive	A
CV160	7	Antigen	Strong positive	A
CV160	8	Antigen	Negative	A
CV160	8	Antigen	Strong positive	A
CV160	8	Antigen	Negative	A
CV160	8	Antigen	Negative	A
CV160	10	Antigen	Negative	A
CV160	10	Antigen	Negative	A
CV160	10	Antigen	Medium positive	A
CV160	10	Antigen	Strong positive	A
CV160	11	Antigen	Negative	A
CV160	11	Antigen	Medium positive	A
CV160	11	Antigen	Strong positive	A
CV160	11	Antigen	Negative	A
CV161a	7	Antigen	Medium positive	A
CV161a	7	Antigen	Negative	A
CV161a	7	Antigen	Medium positive	U
CV161a	7	Antigen	Strong positive	A
CV161a	8	Antigen	Negative	A
CV161a	8	Antigen	Strong positive	A
CV161a	8	Antigen	Negative	A
CV161a	8	Antigen	Negative	A
CV161a	9	Antigen	Strong positive	A
CV161a	9	Antigen	Negative	A
CV161a	9	Antigen	Negative	A
CV161a	9	Antigen	Medium positive	A
CV161a	10	Antigen	Negative	A
CV161a	10	Antigen	Negative	A
CV161a	10	Antigen	Medium positive	A
CV161a	10	Antigen	Strong positive	A
CV161a	11	Antigen	Negative	A
CV161a	11	Antigen	Medium positive	A
CV161a	11	Antigen	Strong positive	A
CV161a	11	Antigen	Negative	A
CV161b	7	Nucleic acid	Medium positive	A
CV161b	7	Nucleic acid	Negative	A
CV161b	7	Nucleic acid	Medium positive	A
CV161b	7	Nucleic acid	Strong positive	A
CV161b	8	Nucleic acid	Negative	A
CV161b	8	Nucleic acid	Strong positive	A
CV161b	8	Nucleic acid	Negative	A
CV161b	8	Nucleic acid	Negative	A
CV161b	9	Nucleic acid	Strong positive	A
CV161b	9	Nucleic acid	Negative	A
CV161b	9	Nucleic acid	Negative	A
CV161b	9	Nucleic acid	Medium positive	A
CV161b	10	Nucleic acid	Negative	A
CV161b	10	Nucleic acid	Negative	A
CV161b	10	Nucleic acid	Medium positive	A
CV161b	10	Nucleic acid	Strong positive	A
CV161b	11	Nucleic acid	Negative	A
CV161b	11	Nucleic acid	Medium positive	A
CV161b	11	Nucleic acid	Strong positive	A
CV161b	11	Nucleic acid	Negative	A
CV162	9	Antigen	Strong positive	A
CV162	9	Antigen	Negative	A
CV162	9	Antigen	Negative	A
CV162	9	Antigen	Medium positive	A
CV162	10	Antigen	Negative	A
CV162	10	Antigen	Negative	A
CV162	10	Antigen	Medium positive	A
CV162	10	Antigen	Strong positive	A
CV163	7	Antigen	Medium positive	A
CV163	7	Antigen	Negative	A
CV163	7	Antigen	Medium positive	A
CV163	7	Antigen	Strong positive	A
CV163	8	Antigen	Negative	A
CV163	8	Antigen	Strong positive	A
CV163	8	Antigen	Negative	A
CV163	8	Antigen	Negative	A
CV163	9	Antigen	Strong positive	A
CV163	9	Antigen	Negative	A
CV163	9	Antigen	Negative	A
CV163	9	Antigen	Medium positive	U
CV163	10	Antigen	Negative	A
CV163	10	Antigen	Negative	A
CV163	10	Antigen	Medium positive	A
CV163	10	Antigen	Strong positive	A
CV164	7	Nucleic acid	Medium positive	A
CV164	7	Nucleic acid	Negative	A
CV164	7	Nucleic acid	Medium positive	A
CV164	7	Nucleic acid	Strong positive	A
CV164	8	Antigen	Negative	A
CV164	8	Antigen	Strong positive	A
CV164	8	Antigen	Negative	A
CV164	8	Antigen	Negative	A
CV164	9	Nucleic acid	Strong positive	A
CV164	9	Nucleic acid	Negative	A
CV164	9	Nucleic acid	Negative	A
CV164	9	Nucleic acid	Medium positive	A
CV164	10	Antigen	Negative	A
CV164	10	Antigen	Negative	A
CV164	10	Antigen	Medium positive	A
CV164	10	Antigen	Strong positive	A
CV165	7	Antigen	Medium positive	A
CV165	7	Antigen	Negative	A
CV165	7	Antigen	Medium positive	A
CV165	7	Antigen	Strong positive	A
CV165	8	Antigen	Negative	A
CV165	8	Antigen	Strong positive	A
CV165	8	Antigen	Negative	A
CV165	8	Antigen	Negative	A
CV165	9	Antigen	Strong positive	A
CV165	9	Antigen	Negative	A
CV165	9	Antigen	Negative	A
CV165	9	Antigen	Medium positive	A
CV165	10	Antigen	Negative	A
CV165	10	Antigen	Negative	A
CV165	10	Antigen	Medium positive	A
CV165	10	Antigen	Strong positive	A
CV165	11	Antigen	Negative	A
CV165	11	Antigen	Medium positive	A
CV165	11	Antigen	Strong positive	A
CV165	11	Antigen	Negative	A
CV166	7	Antigen	Medium positive	A
CV166	7	Antigen	Negative	A
CV166	7	Antigen	Medium positive	A
CV166	7	Antigen	Strong positive	A
CV166	8	Antigen	Negative	A
CV166	8	Antigen	Strong positive	A
CV166	8	Antigen	Negative	A
CV166	8	Antigen	Negative	A
CV166	10	Antigen	Negative	A
CV166	10	Antigen	Negative	A
CV166	10	Antigen	Medium positive	A
CV166	10	Antigen	Strong positive	A
CV166	11	Antigen	Negative	A
CV166	11	Antigen	Medium positive	A
CV166	11	Antigen	Strong positive	A
CV166	11	Antigen	Negative	A
CV167	7	Antigen	Medium positive	A
CV167	7	Antigen	Negative	A
CV167	7	Antigen	Medium positive	A
CV167	7	Antigen	Strong positive	A
CV167	8	Antigen	Negative	A
CV167	8	Antigen	Strong positive	A
CV167	8	Antigen	Negative	A
CV167	8	Antigen	Negative	A
CV167	10	Antigen	Negative	A
CV167	10	Antigen	Negative	A
CV167	10	Antigen	Medium positive	A
CV167	10	Antigen	Strong positive	A
CV168	7	Antigen	Medium positive	A
CV168	7	Antigen	Negative	A
CV168	7	Antigen	Medium positive	A
CV168	7	Antigen	Strong positive	A
CV168	8	Antigen	Negative	A
CV168	8	Antigen	Strong positive	A
CV168	8	Antigen	Negative	A
CV168	8	Antigen	Negative	A
CV168	9	Antigen	Strong positive	A
CV168	9	Antigen	Negative	A
CV168	9	Antigen	Negative	A
CV168	9	Antigen	Medium positive	A
CV169a	7	Nucleic acid	Medium positive	A
CV169a	7	Nucleic acid	Negative	A
CV169a	7	Nucleic acid	Medium positive	A
CV169a	7	Nucleic acid	Strong positive	A
CV169a	8	Nucleic acid	Negative	A
CV169a	8	Nucleic acid	Strong positive	A
CV169a	8	Nucleic acid	Negative	A
CV169a	8	Nucleic acid	Negative	A
CV169a	9	Nucleic acid	Strong positive	A
CV169a	9	Nucleic acid	Negative	A
CV169a	9	Nucleic acid	Negative	A
CV169a	9	Nucleic acid	Medium positive	A
CV169a	10	Nucleic acid	Negative	A
CV169a	10	Nucleic acid	Negative	A
CV169a	10	Nucleic acid	Medium positive	A
CV169a	10	Nucleic acid	Strong positive	A
CV169a	11	Nucleic acid	Negative	A
CV169a	11	Nucleic acid	Medium positive	A
CV169a	11	Nucleic acid	Strong positive	A
CV169a	11	Nucleic acid	Negative	A
CV169b	8	Antigen	Negative	A
CV169b	8	Antigen	Strong positive	A
CV169b	8	Antigen	Negative	A
CV169b	8	Antigen	Negative	A
CV169b	9	Antigen	Strong positive	A
CV169b	9	Antigen	Negative	A
CV169b	9	Antigen	Negative	A
CV169b	9	Antigen	Medium positive	A
CV169b	10	Antigen	Negative	A
CV169b	10	Antigen	Negative	A
CV169b	10	Antigen	Medium positive	A
CV169b	10	Antigen	Strong positive	A
CV169b	11	Antigen	Negative	A
CV169b	11	Antigen	Medium positive	A
CV169b	11	Antigen	Strong positive	A
CV169b	11	Antigen	Negative	A
CV170	7	Antigen	Medium positive	A
CV170	7	Antigen	Negative	A
CV170	7	Antigen	Medium positive	A
CV170	7	Antigen	Strong positive	A
CV170	8	Antigen	Negative	A
CV170	8	Antigen	Strong positive	A
CV170	8	Antigen	Negative	A
CV170	8	Antigen	Negative	A
CV170	9	Antigen	Strong positive	A
CV170	9	Antigen	Negative	A
CV170	9	Antigen	Negative	A
CV170	9	Antigen	Medium positive	A
CV170	11	Antigen	Negative	A
CV170	11	Antigen	Medium positive	A
CV170	11	Antigen	Strong positive	A
CV170	11	Antigen	Negative	A
CV171	7	Antigen	Medium positive	A
CV171	7	Antigen	Negative	A
CV171	7	Antigen	Medium positive	A
CV171	7	Antigen	Strong positive	A
CV172	7	Antigen	Medium positive	A
CV172	7	Antigen	Negative	A
CV172	7	Antigen	Medium positive	A
CV172	7	Antigen	Strong positive	A
CV173	8	Antigen	Negative	A
CV173	8	Antigen	Strong positive	A
CV173	8	Antigen	Negative	U
CV173	8	Antigen	Negative	A
CV173	9	Antigen	Strong positive	A
CV173	9	Antigen	Negative	A
CV173	9	Antigen	Negative	A
CV173	9	Antigen	Medium positive	A
CV173	10	Antigen	Negative	A
CV173	10	Antigen	Negative	A
CV173	10	Antigen	Medium positive	A
CV173	10	Antigen	Strong positive	A
CV173	11	Antigen	Negative	A
CV173	11	Antigen	Medium positive	A
CV173	11	Antigen	Strong positive	A
CV173	11	Antigen	Negative	A
CV174	8	Antigen	Negative	A
CV174	8	Antigen	Strong positive	A
CV174	8	Antigen	Negative	A
CV174	8	Antigen	Negative	A
CV174	10	Antigen	Negative	A
CV174	10	Antigen	Negative	A
CV174	10	Antigen	Medium positive	A
CV174	10	Antigen	Strong positive	A
CV174	11	Antigen	Negative	A
CV174	11	Antigen	Medium positive	A
CV174	11	Antigen	Strong positive	A
CV174	11	Antigen	Negative	A
CV175	8	Antigen	Negative	A
CV175	8	Antigen	Strong positive	A
CV175	8	Antigen	Negative	A
CV175	8	Antigen	Negative	A
CV175	10	Antigen	Negative	A
CV175	10	Antigen	Negative	A
CV175	10	Antigen	Medium positive	A
CV175	10	Antigen	Strong positive	A
CV175	11	Antigen	Negative	A
CV175	11	Antigen	Medium positive	A
CV175	11	Antigen	Strong positive	A
CV175	11	Antigen	Negative	A
CV176	8	Antigen	Negative	A
CV176	8	Antigen	Strong positive	A
CV176	8	Antigen	Negative	A
CV176	8	Antigen	Negative	A
CV176	9	Antigen	Strong positive	A
CV176	9	Antigen	Negative	A
CV176	9	Antigen	Negative	A
CV176	9	Antigen	Medium positive	A
CV176	10	Antigen	Negative	A
CV176	10	Antigen	Negative	A
CV176	10	Antigen	Medium positive	A
CV176	10	Antigen	Strong positive	A
CV176	11	Antigen	Negative	A
CV176	11	Antigen	Medium positive	A
CV176	11	Antigen	Strong positive	A
CV176	11	Antigen	Negative	A
CV177	8	Antigen	Negative	A
CV177	8	Antigen	Strong positive	A
CV177	8	Antigen	Negative	A
CV177	8	Antigen	Negative	A
CV177	10	Antigen	Negative	A
CV177	10	Antigen	Negative	A
CV177	10	Antigen	Medium positive	A
CV177	10	Antigen	Strong positive	A
CV177	11	Antigen	Negative	A
CV177	11	Antigen	Medium positive	A
CV177	11	Antigen	Strong positive	A
CV177	11	Antigen	Negative	A
CV178	8	Nucleic acid	Negative	A
CV178	8	Nucleic acid	Strong positive	A
CV178	8	Nucleic acid	Negative	A
CV178	8	Nucleic acid	Negative	A
CV178	10	Nucleic acid	Negative	A
CV178	10	Nucleic acid	Negative	A
CV178	10	Nucleic acid	Medium positive	A
CV178	10	Nucleic acid	Strong positive	A
CV179	8	Antigen	Negative	A
CV179	8	Antigen	Strong positive	A
CV179	8	Antigen	Negative	A
CV179	8	Antigen	Negative	A
CV179	9	Antigen	Strong positive	A
CV179	9	Antigen	Negative	A
CV179	9	Antigen	Negative	A
CV179	9	Antigen	Medium positive	A
CV179	10	Antigen	Negative	A
CV179	10	Antigen	Negative	A
CV179	10	Antigen	Medium positive	A
CV179	10	Antigen	Strong positive	A
CV179	11	Antigen	Negative	A
CV179	11	Antigen	Medium positive	A
CV179	11	Antigen	Strong positive	A
CV179	11	Antigen	Negative	A
CV180	8	Antigen	Negative	A
CV180	8	Antigen	Strong positive	A
CV180	8	Antigen	Negative	A
CV180	8	Antigen	Negative	A
CV180	9	Antigen	Strong positive	A
CV180	9	Antigen	Negative	A
CV180	9	Antigen	Negative	A
CV180	9	Antigen	Medium positive	A
CV180	10	Antigen	Negative	A
CV180	10	Antigen	Negative	A
CV180	10	Antigen	Medium positive	A
CV180	10	Antigen	Strong positive	A
CV180	11	Antigen	Negative	A
CV180	11	Antigen	Medium positive	A
CV180	11	Antigen	Strong positive	A
CV180	11	Antigen	Negative	A
CV181a	8	Antigen	Negative	A
CV181a	8	Antigen	Strong positive	A
CV181a	8	Antigen	Negative	A
CV181a	8	Antigen	Negative	A
CV181a	10	Antigen	Negative	A
CV181a	10	Antigen	Negative	A
CV181a	10	Antigen	Medium positive	A
CV181a	10	Antigen	Strong positive	A
CV181b	8	Antigen	Negative	A
CV181b	8	Antigen	Strong positive	A
CV181b	8	Antigen	Negative	A
CV181b	8	Antigen	Negative	A
CV181b	10	Antigen	Negative	A
CV181b	10	Antigen	Negative	A
CV181b	10	Antigen	Medium positive	A
CV181b	10	Antigen	Strong positive	A
CV181c	8	Nucleic acid	Negative	A
CV181c	8	Nucleic acid	Strong positive	A
CV181c	8	Nucleic acid	Negative	A
CV181c	8	Nucleic acid	Negative	A
CV181c	10	Nucleic acid	Negative	A
CV181c	10	Nucleic acid	Negative	A
CV181c	10	Nucleic acid	Medium positive	A
CV181c	10	Nucleic acid	Strong positive	A
CV182	8	Antigen	Negative	A
CV182	8	Antigen	Strong positive	A
CV182	8	Antigen	Negative	A
CV182	8	Antigen	Negative	A
CV182	10	Antigen	Negative	A
CV182	10	Antigen	Negative	A
CV182	10	Antigen	Medium positive	A
CV182	10	Antigen	Strong positive	A
CV182	11	Antigen	Negative	A
CV182	11	Antigen	Medium positive	A
CV182	11	Antigen	Strong positive	A
CV182	11	Antigen	Negative	A
CV183	9	Antigen	Strong positive	A
CV183	9	Antigen	Negative	A
CV183	9	Antigen	Negative	A
CV183	9	Antigen	Medium positive	A
CV183	10	Antigen	Negative	A
CV183	10	Antigen	Negative	A
CV183	10	Antigen	Medium positive	A
CV183	10	Antigen	Strong positive	A
CV183	11	Antigen	Negative	A
CV183	11	Antigen	Medium positive	A
CV183	11	Antigen	Strong positive	A
CV183	11	Antigen	Negative	A
CV184	10	Antigen	Negative	A
CV184	10	Antigen	Negative	A
CV184	10	Antigen	Medium positive	U
CV184	10	Antigen	Strong positive	A
CV184	11	Antigen	Negative	A
CV184	11	Antigen	Medium positive	A
CV184	11	Antigen	Strong positive	A
CV184	11	Antigen	Negative	A
CV185	9	Antigen	Strong positive	A
CV185	9	Antigen	Negative	A
CV185	9	Antigen	Negative	A
CV185	9	Antigen	Medium positive	A
CV185	10	Antigen	Negative	A
CV185	10	Antigen	Negative	A
CV185	10	Antigen	Medium positive	A
CV185	10	Antigen	Strong positive	A
CV185	11	Antigen	Negative	A
CV185	11	Antigen	Medium positive	A
CV185	11	Antigen	Strong positive	A
CV185	11	Antigen	Negative	A
CV186	9	Antigen	Strong positive	A
CV186	9	Antigen	Negative	A
CV186	9	Antigen	Negative	A
CV186	9	Antigen	Medium positive	A
CV186	10	Antigen	Negative	A
CV186	10	Antigen	Negative	A
CV186	10	Antigen	Medium positive	A
CV186	10	Antigen	Strong positive	A
CV186	11	Antigen	Negative	A
CV186	11	Antigen	Medium positive	A
CV186	11	Antigen	Strong positive	A
CV186	11	Antigen	Negative	A
CV187	9	Antigen	Strong positive	A
CV187	9	Antigen	Negative	A
CV187	9	Antigen	Negative	A
CV187	9	Antigen	Medium positive	A
CV187	10	Antigen	Negative	A
CV187	10	Antigen	Negative	A
CV187	10	Antigen	Medium positive	A
CV187	10	Antigen	Strong positive	A
CV187	11	Antigen	Negative	A
CV187	11	Antigen	Medium positive	A
CV187	11	Antigen	Strong positive	A
CV187	11	Antigen	Negative	A
CV189a	9	Antigen	Strong positive	A
CV189a	9	Antigen	Negative	A
CV189a	9	Antigen	Negative	A
CV189a	9	Antigen	Medium positive	A
CV189a	10	Antigen	Negative	A
CV189a	10	Antigen	Negative	A
CV189a	10	Antigen	Medium positive	A
CV189a	10	Antigen	Strong positive	A
CV189b	9	Nucleic acid	Strong positive	A
CV189b	9	Nucleic acid	Negative	A
CV189b	9	Nucleic acid	Negative	A
CV189b	9	Nucleic acid	Medium positive	A
CV189b	10	Nucleic acid	Negative	A
CV189b	10	Nucleic acid	Negative	A
CV189b	10	Nucleic acid	Medium positive	A
CV189b	10	Nucleic acid	Strong positive	A
FHA01	1	Nucleic acid	Strong positive	A
FHA01	1	Nucleic acid	Medium positive	A
FHA01	1	Nucleic acid	Negative	A
FHA01	3	Nucleic acid	Negative	A
FHA01	3	Nucleic acid	Strong positive	A
FHA01	3	Nucleic acid	Negative	U
FHA01	3	Nucleic acid	Negative	A
FHA01	5	Antigen	Medium positive	A
FHA01	5	Antigen	Medium positive	A
FHA01	5	Antigen	Medium positive	A
FHA01	5	Antigen	Strong positive	A
FHA01	6	Antigen	Strong positive	A
FHA01	6	Antigen	Medium positive	U
FHA01	6	Antigen	Negative	A
FHA01	6	Antigen	Negative	A
FHA02	1	Nucleic acid	Strong positive	U
FHA02	1	Nucleic acid	Medium positive	A
FHA02	1	Nucleic acid	Negative	A
FHA02	3	Nucleic acid	Negative	A
FHA02	3	Nucleic acid	Strong positive	A
FHA02	3	Nucleic acid	Negative	A
FHA02	3	Nucleic acid	Negative	A
FHA02	5	Antigen	Medium positive	A
FHA02	5	Antigen	Medium positive	A
FHA02	5	Antigen	Medium positive	A
FHA02	5	Antigen	Strong positive	A
FHA02	6	Antigen	Strong positive	A
FHA02	6	Antigen	Medium positive	A
FHA02	6	Antigen	Negative	A
FHA02	6	Antigen	Negative	A
[truncated: 735 more rows]

## Sheet: No. testing site per survey
Survey	Month	No.Testing sites
1	Mar '21	23
2	May '21	35
3	July '21	35
4	Sept '21	45
5	Nov '21	67
6	Jan '22	90
7	Mar '22	106
8	May '22	105
9	July '22	110
10	Sept '22	97
11	Nov '22	74

## Sheet: Testing method
Survey	1	2	3	4	5	6	7	8	9	10	11
Participants	2022-03-21	2022-05-21	2022-07-21	2022-09-21	2022-11-21	2022-01-22	2022-03-22	2022-05-22	2022-07-22	2022-09-22	2022-11-22
Ag	10	23	16	22	43	53	51	61	40	55	44
NA	13	11	15	23	24	35	49	41	48	38	24
Total	23	34	31	45	67	88	100	102	88	93	68
%Ag	43	68	52	49	64	60	51	0.598039	0.454545	0.591398	0.647059
%NA	57	32	48	51	36	40	46	0.401961	0.545455	0.408602	0.352941

## Sheet: Testing platform
				Rapid Antigen Test
Survey	Month	Total		Abbott Panbio	BD veritor	SD Bioscensor	Boson	CovClear	Artron	Assure Tech Fastep	BTNX	ND
1	2021-03-01	10		6	2					1		1
2	2021-05-22	24		21	2					1
3	2021-07-21	16		12	2					1	1
4	2021-09-21	22		12	2					1	7
5	2021-11-21	40		22		1	1				3	13
6	2022-01-01	51		26				1	2	1	12	9
7	2022-03-01	37		15				1	1		6	14
8	2022-05-01	62		29			1				16	16
9	2022-07-01	34		19			2				12	1
10	2022-09-01	49		20			1				13	15
11	2022-11-01	27		19		1					1	6
	AVGE			18.2727	2	1	1.25	1	1.5	1	7.88889	9.375
	STD
				Nucleic Acid Amplification Test
Survey	Month	Total		Abbott ID NOW	Biomeme	Hyris - bCube	Lucira RT-LAMP	Other (NEAR, diasorin, roche cobas, triple lock)	ND
1	2021-03-01	14		12		2
2	2021-05-22	11		10		1
3	2021-07-21	17		12	2	1		1	1
4	2021-09-21	23		11	2	2		5	3
5	2021-11-21	26		15	5		1		5
6	2022-01-01	40		25	7	2	1		5
7	2022-03-01	14		8	5	1
8	2022-05-01	43		21	6	4	3		9
9	2022-07-01	17		5	5		1	1	5
10	2022-09-01	15		6	4		1		4
11	2022-11-01	24		13	6		1		4
	AVGE			12.5455	4.66667	1.85714	1.33333	2.33333	4.5
	STD

## Sheet: Medium positive Stat
	Test	Survey	Estimated probability	*SE
	RAD	1	0.315	0.125
	NAT	1	0.974	0.025
	RAD	2	0.402	0.092
	NAT	2	0.97	0.026
	RAD	^4	0.598	0.102
	NAT	4	0.908	0.06
	RAD	5	0.59	0.075
	NAT	5	0.977	0.021
	RAD	6	0.733	0.071
	NAT	6	0.962	0.025
	RAD	7	0.968	0.023
	NAT	7	1	0
	RAD	^9	0.958	0.029
	NAT	9	0.993	0.007
	RAD	10	0.967	0.023
	NAT	10	1	0
	RAD	11	0.918	0.039
	NAT	11	1	0
	*SE =Standard error
	^No medium positive samples were sent in surveys 3 and 8.

## Sheet: Negative Stat
	Test	Survey	Estimated probability	*SE
	RAD	1	0.923	0.045
	NAT	1	0.979	0.021
	RAD	2	0.946	0.029
	NAT	2	0.976	0.029
	RAD	3	1	0
	NAT	3	0.934	0.04
	RAD	4	0.975	0.013
	NAT	4	0.924	0.049
	RAD	^6	0.986	0.011
	NAT	6	0.969	0.012
	RAD	7	0.999	0.001
	NAT	7	1	0
	RAD	8	0.997	0.004
	NAT	8	0.994	0.005
	RAD	9	0.998	0.001
	NAT	9	0.995	0.005
	RAD	10	0.999	0.001
	NAT	10	1	0
	RAD	11	0.997	0.002
	NAT	11	1	0
	*SE =Standard error
	^ Note that no negative samples were included in the 5th survey

## Sheet: Strong positive Stat
	Test	Survey	Estimated probability	*SE
	RAD	1	0.862	0.073
	NAT	1	0.97	0.033
	RAD	3	1	0
	NAT	3	0.906	0.05
	RAD	4	0.953	0.025
	NAT	4	0.892	0.043
	RAD	5	0.951	0.022
	NAT	5	0.973	0.034
	RAD	6	0.974	0.014
	NAT	6	0.954	0.028
	RAD	7	0.998	0.002
	NAT	7	1	0
	RAD	8	0.993	0.006
	NAT	8	0.991	0.01
	RAD	9	0.997	0.002
	NAT	9	0.992	0.009
	RAD	10	0.997	0.002
	NAT	10	1	0
	RAD	11	0.993	0.004
	NAT	11	1	0
	*SE =Standard error
